1           **Autotransporters drive biofilm formation and auto-aggregation in the**  
2                           **diderm Firmicute *Veillonella parvula*.**

3   Nathalie Béchon<sup>1,2,#</sup>, Alicia Jiménez-Fernández<sup>1,#</sup>, Jerzy Witwinowski<sup>3</sup>, Emilie Bierque<sup>1,4,7</sup>,  
4   Najwa Taib<sup>3,5</sup>, Thomas Cokelaer<sup>5,6</sup>, Laurence Ma<sup>6</sup>, Jean-Marc Ghigo<sup>1</sup>, Simonetta Gribaldo<sup>3</sup> and  
5   Christophe Beloin<sup>1,\*</sup>

6   <sup>1</sup> Genetics of Biofilm Laboratory, Institut Pasteur, UMR CNRS2001, Paris, 75015, France

7   <sup>2</sup> Université de Paris, Sorbonne Paris Cité, Paris, France

8   <sup>3</sup> Evolution Biology of the Microbial Cell, Institut Pasteur, UMR CNRS2001, Paris, France

9   <sup>4</sup> Sorbonne Université, Collège doctoral, F-75005 Paris, France

10   <sup>5</sup> Hub de Bioinformatique et Biostatistique – Département Biologie Computationnelle, Institut  
11   Pasteur, USR 3756 CNRS, Paris, France

12   <sup>6</sup> Biomics, C2RT, Institut Pasteur, Paris, France Plate-forme Technologique Biomics – Centre  
13   de Ressources et Recherches Technologiques (C2RT), Institut Pasteur, Paris, France

14   <sup>7</sup> Present address: Leptospirosis Research and Expertise Unit, Institut Pasteur in New  
15   Caledonia, Institut Pasteur International Network, Noumea, New Caledonia.

16  
17   #The authors equally contributed to the work.

18  
19   **Running Title:** Autotransporters drive *V. parvula* biofilm.

20  
21   **\*Corresponding author:** Christophe Beloin ([christophe.beloin@pasteur.fr](mailto:christophe.beloin@pasteur.fr))

22 **ABSTRACT**

23 The Negativicutes are a clade of Firmicutes that have retained the ancestral diderm character  
24 and possess an outer membrane. One of the best studied Negativicute, *Veillonella parvula*, is  
25 an anaerobic commensal and opportunistic pathogen inhabiting complex human microbial  
26 communities, including the gut and the dental plaque microbiota. Whereas adhesion and biofilm  
27 capacity of *V. parvula* is expected to be crucial for its maintenance and development in these  
28 environments, studies of *V. parvula* adhesion have been hindered by the lack of efficient genetic  
29 tools to perform functional analyses in this bacterium. Here, we took advantage of a recently  
30 described naturally transformable *V. parvula* isolate, SKV38, and adapted tools developed for  
31 the closely related *Clostridia spp.* to perform random transposon and targeted mutagenesis to  
32 identify *V. parvula* genes involved in biofilm formation. We show that type V secreted  
33 autotransporters -typically found in diderm bacteria- are the main determinants of *V. parvula*  
34 auto-aggregation and biofilm formation, which compete with each other for binding either to  
35 cells or to surfaces, with strong consequences on *V. parvula* biofilm formation capacity. We  
36 also show that inactivation of the gene coding for a poorly characterized metal-dependent  
37 phosphohydrolase HD domain protein conserved in the Firmicutes and their closely related  
38 diderm phyla inhibits autotransporter-mediated biofilm formation. This study paves the way for  
39 further molecular characterization of *V. parvula* interactions with other bacteria and the host  
40 within complex microbiota environments.

41

42

43

## 44 INTRODUCTION

45        Negativicutes are atypical and poorly studied Firmicute lineages displaying an outer  
46 envelope with lipopolysaccharide (1). Among the Negativicutes, *Veillonella* spp. are anaerobic  
47 diderm cocci that commonly inhabit the human and animal microbiota. One of their best studied  
48 species, *Veillonella parvula* (2), is a natural inhabitant of multiple different microbiota,  
49 including the human gut (3, 4). *V. parvula* is considered a commensal organism, and proposed  
50 to play a role in the development of immunity through its capacity to colonize the infant gut (5,  
51 6). It is a key early colonizer of the dental plaque during the establishment of sessile microbial  
52 communities called biofilms (7), promoting multi-species growth and playing a central role in  
53 the metabolism of community members through lactic acid consumption (8). However, *V.*  
54 *parvula* is also described as an opportunistic pathogen and has been associated with diverse  
55 infections, including osteomyelitis, endocarditis, spondylodiscitis, abscesses as well as  
56 systemic infections (9–13).

57        The importance of *V. parvula* in the development of microbial community spurred our  
58 interest in identifying the determinants of its adhesion and biofilm formation capacities.  
59 Moreover, considering the presence of an outer membrane in this atypical Firmicute, we  
60 wondered whether *V. parvula* uses known diderm or monoderm biofilm determinants, or rather  
61 currently undescribed adhesion factors. We previously studied *V. parvula* DSM2008 as a model  
62 diderm Firmicute strain (14) to investigate its outer membrane (OM) protein composition and  
63 detected 78 OM proteins, thirteen of which being potential adhesins belonging to the type V  
64 family of secreted autotransporter proteins (T5SS) (15). Autotransporter proteins are  
65 specifically found in diderms and all share common structural and functional features: a Sec-  
66 dependent signal peptide, a passenger domain providing the protein function, and an outer-  
67 membrane  $\beta$ -barrel domain that allows secretion of the passenger domain (16). However, the  
68 challenge of genetic manipulation in *V. parvula* DSM2008 severely limited the study of these  
69 adhesins in this strain.

70        Here, we have sequenced and annotated the genome of *V. parvula* SKV38, a recently  
71 isolated, naturally transformable and genetically amenable strain (17). We adapted and  
72 developed genetic tools for this organism, permitting random and site directed mutagenesis,  
73 plasmid complementation and controlled expression using an inducible promoter. This enabled  
74 us to identify and characterize factors involved in *V. parvula* biofilm formation. We found that  
75 the main *V. parvula* biofilm modulating determinants are T5SS adhesins, i.e. typical diderm

76 determinants. We also showed that a locus encoding a metal-dependent phosphohydrolase HD  
77 domain protein is involved in biofilm formation, similarly to what was shown in the  
78 prototypical monoderm *Bacillus subtilis* (18). Therefore, our results demonstrate that diderm  
79 Firmicutes use a mixture of diderm/monoderm factors to modulate their ability to engage into  
80 biofilm lifestyle, supporting the idea that monoderm and diderm molecular systems could have  
81 co-evolved in these atypical Firmicutes.

82

## 83 RESULTS

### 84 PacBio sequencing of the genetically amenable *V. parvula* SKV38 strain

85 We sequenced the *V. parvula* SKV38 whole genome using PacBio sequencing and  
86 obtained 338,310 subreads with a mean length of 9,080 bp (Figure S1A). Assembly was  
87 performed with Canu and no gaps or drops of coverage was detected based on  
88 sequana\_coverage output (Figure S1B) (19). One contig of 2,146,482 bp was generated after  
89 assembly closely matching the genome size (2.1422 Mbp) and GC content (38.7%, expected  
90 38.6%) of the reference *V. parvula* DSM2008 strain (see supplementary material and methods  
91 for details). PROKKA annotation of the *V. parvula* SKV38 genome detected 1,912 predicted  
92 protein-encoding open reading frame (ORF), 12 rRNA, 49 tRNA and one tmRNA. Rapid  
93 Annotation using Subsystem Technology (RAST) analysis assigned 53% of the predicted  
94 proteins to known subsystems (Figure 1A). The two-way average nucleotide identity (ANI)  
95 between SKV38 and the reference strain DSM2008 is 95.43% (Figure 1B). A maximum  
96 likelihood tree of concatenated RpoB-RpoC-InfB sequences situated SKV38 strain among the  
97 Negativicutes, within the *V. parvula* clade (Figure 2).

98

### 99 Random transposon mutagenesis reveals two *V. parvula* SKV38 genes involved in biofilm 100 formation

101 In order to identify genes involved in biofilm formation, we performed random  
102 transposon mutagenesis in *V. parvula* SKV38 using the pRPF215 plasmid carrying an inducible  
103 transposase and a mariner-based transposon previously used to mutagenize *Clostridium difficile*  
104 (20), a close relative of the Negativicutes. We screened 940 individual transposon mutants for  
105 biofilm formation using crystal violet staining (CV) static biofilm assay in 96-well microtiter  
106 plates and identified eight independent mutants with significant reduction in biofilm formation  
107 (Figure 3A). Whole genome sequencing localized the transposons in two loci putatively  
108 implicated in biofilm formation (Figure 3B). The most affected mutants correspond to  
109 insertions in *FNLLGLLA\_00516* (seven mutants), encoding a T5SS type Vc trimeric  
110 autotransporter. One transposon mutant was inserted in *FNLLGLLA\_01127*, encoding a  
111 putative HD phosphatase (Figure 3B).

112

### 113 *FNLLGLLA\_00516* encodes a trimeric autotransporter involved in auto-aggregation

114 *FNLLGLLA\_00516* encodes a protein containing several domains usually identified in  
115 the T5SS type Vc trimeric autotransporters. Trimeric autotransporters are OM proteins specific  
116 of diderm bacteria that have been widely studied for their ability to bind to different surfaces  
117 or other bacteria (21). *FNLLGLLA\_00516* is a homolog of *V. parvula* DSM2008 *vpar\_0464*,  
118 which was shown to encode a protein detected in the OM (15). *FNLLGLLA\_00516* was  
119 annotated by PROKKA as BtaF, a trimeric autotransporter identified in *Brucella suis* involved  
120 in adhesion to extracellular matrix and abiotic surfaces (22). Here, we renamed it *Veillonella*  
121 *trimeric autotransporter A* (VtaA), as the first trimeric autotransporter involved in biofilm  
122 formation identified in *V. parvula* SKV38. We deleted the *vtaA* coding sequence and showed  
123 that  $\Delta vtaA$  had no growth defect (Figure S2A) but displayed a marked reduction of biofilm  
124 formation in microtiter plate (Figure 4A). Moreover, while *V. parvula* SKV38 cultures strongly  
125 aggregated,  $\Delta vtaA$  did not (Figure 4B and S3). We constructed the strain *pTet-vtaA*, where the  
126 chromosomal *vtaA* gene is placed under the control of a functional  
127 tetracycline/anhydrotetracycline (aTc) inducible promoter (Figure S4) and showed that its  
128 aggregation capacity and biofilm formation directly correlated with aTc concentration (Figure  
129 4C-D), demonstrating that VtaA-mediated cell-to-cell interactions are critical for biofilm  
130 formation. Whereas the microtiter plate assay corresponds to a static biofilm assay, we also  
131 used continuous flow biofilm microfermentors to investigate the contribution of VtaA to  
132 biofilm formation in dynamic conditions. Surprisingly,  $\Delta vtaA$  formed almost six times more  
133 biofilm than the WT strain in these conditions (Figure 4E). This suggests that auto-aggregation  
134 differentially contributes to biofilm formation in dynamic or static conditions.

135

### 136 ***V. parvula* SKV38 encodes sixteen putative autotransporters in addition to VtaA**

137 The strong biofilm phenotype displayed by the  $\Delta vtaA$  mutant in microfermentor led us  
138 to suspect that additional adhesins could modulate *V. parvula* biofilm formation capacity.  
139 Indeed, searching the *V. parvula* SKV38 genome revealed multiple genes encoding  
140 autotransporters (Table 1): three Va classical monomeric autotransporters with a characteristic  
141 PFAM\_PF03797 autotransporter  $\beta$ -domain (renamed *Veillonella monomeric autotransporter A*  
142 to C : VmaA to C), and eight other putative Vc trimeric autotransporters with a characteristic  
143 PFAM\_PF03895 Yada\_anchor\_domain (renamed *Veillonella trimeric autotransporter B* to I:  
144 VtaB to I). We also identified several partial autotransporters: *FNLLGLLA\_00035*, that only  
145 contains a PFAM\_PF11924 Ve inverse autotransporter  $\beta$ -domain but no putative  $\alpha$ -domain that  
146 normally carries the function of the protein, and *FNLLGLLA\_00036-37* and

147 *FNLLGLLA\_00040-41*, which are homologs of *V. parvula* DSM2008 *Vpar\_0041* and  
148 *Vpar\_0048*, respectively, and that appear to be split in SKV38 (Table 1). Among those, six  
149 autotransporters plus *FNLLGLLA\_00035*, *FNLLGLLA\_00036-37* and *FNLLGLLA\_00040-41*  
150 form a potential genomic cluster coding for adhesins (Figure 1B and 5A), whereas the six others  
151 are located in different areas of the genome (Figure 1B and Figure 5B).

152

153 **The cluster of trimeric autotransporters is involved in surface binding and not**  
154 **aggregation.**

155 To assess the function of the potential adhesins identified in the *V. parvula* SKV38  
156 genome, we constructed -within the cluster of adhesin genes- independent deletion mutants for  
157 the two first autotransporters (*vmaA* and *vtaB*) and a large deletion for the eight adjacent genes  
158 encoding trimeric autotransporters or partial trimeric autotransporters, hereafter called  $\Delta 8$   
159 ( $\Delta FNLLGLLA_00036$  to *vtaF*). We also generated independent individual mutants for each of  
160 the six additional autotransporters located outside of the cluster. These mutants were all tested  
161 for biofilm formation and aggregation capacities. While the previously mentioned  $\Delta vtaA$  strain  
162 was the only mutant involved in cell-to-cell interactions (Figure 6A), both  $\Delta vtaA$  and  $\Delta 8$  led to  
163 lower biofilm formation in microtiter plate (Figure 6B and C), suggesting that the adhesins of  
164 this cluster could be involved in biofilm formation independently of cell-to-cell interactions.  
165 However, we observed no significant difference with the WT when evaluating biofilm capacity  
166 of the  $\Delta 8$  mutant in microfermentor (Figure 6D). To determine whether this was due to flow or  
167 the nature of adhesion surfaces (plastic in microtiter plate vs. glass in microfermentor), we used  
168 plastic microscopy coverslip slides to grow biofilms in microfermentor. Scanning electronic  
169 microscopy (SEM) showed that the WT formed a biofilm displaying filaments and protein  
170 deposits that could be part of *V. parvula* extracellular matrix, whereas  $\Delta vtaA$  formed a much  
171 thicker biofilm, although without filaments and proteins (Figure 6E).  $\Delta 8$ , however, only poorly  
172 covered the plastic coverslip with sporadic aggregates of cells producing extracellular matrix,  
173 consistent with the reduced biofilm formation observed in microtiter plate (Figure 6E). Initial  
174 adhesion assay to glass spatula showed that both *vtaA* and  $\Delta 8$  displayed a lower percentage of  
175 initial adhesion than WT, suggesting that VtaA-mediated auto-aggregation contributed to initial  
176 adhesion while the adhesin cluster is directly involved in surface binding (Figure 6F). These  
177 two contributions were additive since a  $\Delta vtaA\Delta 8$  double mutant showed a reduced initial  
178 adhesion on microfermentor spatula compared to either WT,  $\Delta vtaA$  or  $\Delta 8$  (Figure 6F). In  
179 addition,  $\Delta vtaA\Delta 8$  formed 17 times less biofilm than  $\Delta vtaA$  in microfermentor, indicating that

180 in the absence of VtaA, the adhesins encoded by some of these eight genes strongly promote  
181 mature biofilm formation in microfermentor (Figure 6D).

182 Taken together, these results demonstrate the differential contribution of VtaA and part  
183 of the cluster of adhesin to *V. parvula* SKV38 adhesion and highlight the existence of potential  
184 interference mechanisms between them.

185

## 186 **Prevalence of large adhesin clusters in *Veillonellaceae* genomes**

187 The involvement of T5SS adhesins in the modulation of *V. parvula* biofilm formation  
188 prompted us to broaden our analysis and determine the prevalence of these adhesins in the  
189 *Veillonellaceae*. We plotted the results of a hidden Markov Model (HMM) search for four major  
190 types of bacterial domains found in T5SS adhesins, namely autotransporter (PF03797) typical  
191 of type Va transport, ShlB (PF03865) typical of two-partner system Vb, YadA\_anchor  
192 (PF03895) typical of trimeric autotransporter type Vc transport, and iAT- $\beta$  typical of inverted  
193 autotransporter Ve (PF11924) (Figure 2). Trimeric autotransporters Vc are the most abundant  
194 potential adhesins in *Veillonellaceae*, followed by Va classical autotransporters, while type Vb  
195 two-partner system and Ve inverted autotransporters are only sporadic. Despite this trend, the  
196 numbers of each of these classes varied strongly within the same genus or even the same species  
197 of *Veillonellaceae*, indicating an important plasticity of the autotransporters repertoire.

198 Large clustering of potential adhesin encoding genes observed in SKV38 strain and defined as  
199 a group of two or more adhesin-coding genes immediately upstream of a conserved rRNA  
200 locus, is to our knowledge a peculiar genomic character. We found no evidence of the existence  
201 of this specific adhesin locus outside the *Veillonella* genus. We selected eight *Veillonella* strains  
202 to study more precisely the evolution of the adhesin cluster, including SKV38 and DSM2008.  
203 The trimeric autotransporter adhesins seem to evolve dynamically with numerous domain  
204 swaps, duplications and reductions of gene copies, likely through homologous recombination  
205 (Figure 7). Duplications and deletions could be eased by the presence of short ORFs annotated  
206 as hypothetical proteins presenting a high degree of sequence identity. The most basal strain in  
207 the *Veillonella* phylogeny has a minimal cluster of only three adhesins genes. Throughout the  
208 *Veillonella* genus, the size of the cluster is very variable with a minimal form in *V. atypica*,  
209 with only two adhesins.

210

## 211 ***FNLLGLLA\_01127* encodes an HD phosphatase that inhibits biofilm formation**



212 In addition to genes encoding potential T5SS proteins, we also identified a transposon  
213 mutant in *FNLLGLLA\_01127*, encoding a protein of the HD phosphatase superfamily (Figure  
214 2). The *FNLLGLLA\_01127* gene is homologous to YqeK, a putative phosphatase required for  
215 pellicle formation and the development of biofilm in *B. subtilis* (18). A *FNLLGLLA\_01127*  
216 deletion mutant ( $\Delta 1127$ ) showed a moderate growth defect (Figure S3AB) and a moderate 1.5-  
217 fold decrease in biofilm formation in microtiter plate after correcting for the growth defect  
218 (Figure 8A). This mutant also displayed a slightly faster aggregation rate than the WT during  
219 early time points (Figure 8B). The strongest phenotype of this mutant was detected in  
220 microfermentor with a 9-fold increase in biofilm formation compared to WT (Figure 8C), which  
221 was reduced by expressing *FNLLGLLA\_01127* gene *in trans* (plasmid *p1127*) (Figure 8D).  
222 Scanning electronic microscopy showed that  $\Delta 1127$ , similarly to  $\Delta vtaA$ , formed a thick layered  
223 biofilm, although with fewer filaments and protein deposits compared to WT (Figure 8E).  
224 However, contrary to  $\Delta vtaA$  or  $\Delta 8$  mutants,  $\Delta 1127$  showed no defect in initial adhesion to a  
225 glass spatula (Figure 8F). Interestingly, a  $\Delta 1127\Delta 8$  double mutant formed almost 20 times less  
226 biofilm than  $\Delta 1127$  in microfermentor (Figure 8C), suggesting that at least some of the  
227 autotransporters of the cluster were necessary for  $\Delta 1127$  observed strong biofilm formation in  
228 microfermentor.

229

230

231

## 232 DISCUSSION

233

234 Originally described as a social organism mostly living in biofilm communities (8), *Veillonella*  
235 is a known bacterial member of multiple human microbiota. Although biofilm formation and  
236 adhesion are likely important in these niches, molecular studies in *Veillonella* have been  
237 hindered by the lack of efficient genetic tools. Here, we used genetics tools adapted from  
238 *Clostridia* to characterize factors promoting biofilm formation in a naturally competent  
239 *Veillonella parvula* isolate.

240 We identified a T5SS type Vc trimeric autotransporter, FNLLGLLA\_0516 (VtaA), as an  
241 important biofilm factor promoting *V. parvula* SKV38 auto-aggregation. In addition to Hag1,  
242 a YadA-like autotransporter identified from the related species *V. atypica* involved in  
243 interspecies interactions (23), VtaA represents the first *Veillonella* protein involved in abiotic  
244 surface adhesion and auto-aggregation in diderm Firmicutes. Beyond the potential impact on  
245 *Veillonella* niche colonization, aggregation capacity contributes to bacterial protection from  
246 environmental stresses or host responses (24), promotion of host colonization (25), or  
247 pathogenesis (26). VtaA is homologous to *Brucella suis* trimeric autotransporter BtaF.  
248 However, while *B. suis* BtaF promotes biofilm formation *in vitro*, it was not shown to promote  
249 aggregation (22), suggesting that these two proteins have different functions.

250 In diderm bacteria such as *E. coli*, self-associating autotransporters (SAATs) from the type Va  
251 family and type Vc trimeric autotransporters were shown to contribute to biofilm formation  
252 through their self-recognition properties (27–33). However, in *V. parvula* VtaA-mediated auto-  
253 aggregation either promoted (plastic surface and static conditions) or strongly impaired (glass  
254 surface and continuous-flow conditions) biofilm formation depending on the model used. We  
255 hypothesize that under continuous flow, VtaA-mediated aggregates are more sensitive to flow  
256 than individual cells and that adhesion to surfaces or to the biofilm extracellular matrix might  
257 be more important than cell-to-cell interactions.

258 Interference between cell surface structures is a well-described mechanism by which bacteria  
259 modulate their adhesion properties. In *E. coli*, multiple structures, such as chaperone-usher  
260 fimbriae, LPS O-antigen or capsules, interfere with the self-recognizing autotransporter Ag43  
261 through unknown mechanisms (34–37). Therefore, it is possible that in *V. parvula* VtaA could  
262 compete with other adhesins through steric hindrance or competition for membrane export and  
263 thus limit biofilm formation under continuous-flow conditions. Consistently,  $\Delta vtaA$  enhanced

264 biofilm formation in microfermentor was dependent on the presence of eight genes of the  
265 cluster of trimeric autotransporters, suggesting a competition between VtaA and adhesin(s) of  
266 this cluster. Moreover, we noticed that both VtaA and the 8-gene cluster are necessary for full  
267 initial adhesion to glass spatula in an independent manner, suggesting that any competition  
268 between them only arises later on, during continuous-flow cultures. The exact contribution of  
269 these different trimeric autotransporters to biofilm formation and their interplay with VtaA will  
270 require further characterization.

271 Analysis of *V. parvula* SKV38 genome revealed the presence of seven other potential full-  
272 length autotransporters, but no other types of classical diderm adhesins. None of them appeared  
273 to be involved in cell-to-cell interactions or biofilm formation on abiotic surfaces, and their  
274 function remains unclear. As *V. parvula* is present in different microbiota, it is expected that a  
275 large arsenal of adhesion factors might be necessary to adhere under different mechanical  
276 constraints and on different surfaces, such as tooth enamel or various epithelia. Moreover,  
277 *Veillonella* is known to co-aggregate with *Streptococci* (38–40), that produce *Veillonella*  
278 favored carbon source, lactate (41), and they were shown to specifically co-aggregate with  
279 *Streptococci* and *Actinomyces* strains from the same microbiota, showing that co-aggregation  
280 could have strong implication in niche colonization (42). *V. parvula* and other *Veillonella* are  
281 also associated to different opportunistic infections and the contribution of their adhesins to  
282 pathogenicity remains to be addressed. Finally, some autotransporters have been shown to carry  
283 non-adhesive functions, including protease activity (43), but we detected no classical protease  
284 domain in the *Veillonella* autotransporters.

285  
286 Although we showed that genes encoding autotransporters are widespread in *Veillonellaceae*  
287 genomes, even closely related strains display different numbers, sizes and types of adhesins.  
288 For instance, *V. parvula* DSM2008 encodes three proteins with filamentous haemagglutinin  
289 domain (PF13332), whereas this class of proteins is completely absent in the closely related  
290 SKV38 genome. This suggests rapid evolutionary changes in the repertoire *Veillonella*  
291 adhesins, potentially eased by the presence of an adhesin cluster that facilitates recombination  
292 events between adjacent homologous adhesins and reduces the odds of inactivating genes  
293 involved in important cellular functions by duplication, deletion and recombination. Such a  
294 diversification might be selected for when the environmental pressure imposes to constantly  
295 adapt the adhesive properties, as it might be the case in the various niches colonized by  
296 *Veillonella*.

297 Trimeric autotransporters possess a characteristic YadA\_anchor domain (PF03895) that can be  
298 found mainly in Proteobacteria, but also in Cyanobacteria, Verrucomicrobia, Planctomycetes,  
299 Kiritimatiellaeota, Chlorobi, Synergistetes, Fusobacteria and in the diderm Firmicutes but only  
300 in Negativicutes (<https://pfam.xfam.org/family/PF03895>, Dec 2019 (44)). Interestingly, the  
301 YadA\_anchor of all *Veillonella* trimeric autotransporters is not at the very end of the C-  
302 terminus, where it is usually found in Proteobacteria, but is pre-C-terminal, followed by either  
303 a coiled domain or a S-layer homology (SLH) domain (Figure 5). While the function of the  
304 coiled domain is unknown, in some bacteria, the periplasmic SLH domains bind peptidoglycan  
305 (45), suggesting that *Veillonella* trimeric autotransporters could be non-covalently attached to  
306 the peptidoglycan. These extra-domains after the YadA\_anchor are also found in other  
307 Negativicutes (notably the extra SLH domain) and in some other diderm phyla phylogenetically  
308 related to the Firmicutes such as Synergistetes and Fusobacteria (DataSet 1). Interestingly, in  
309 addition to possessing trimeric autotransporters with an extra coiled C-terminus domain, the  
310 Fusobacteria *Streptobacillus moniliformis* ATCC14647 carries eight genes encoding unique  
311 trimeric autotransporters with an extra OmpA\_family domain (PF00691) at their extreme C-  
312 terminus, a domain known to display affinity to peptidoglycan (46) (DataSet 1). This suggests  
313 that a subset of phylogenetically close diderm bacteria have evolved trimeric autotransporters  
314 integrating different peptidoglycan binding domains. Whether these domains have an impact  
315 on trimeric autotransporters function or exposure to the surface, or more generally on outer  
316 membrane stabilization is presently unknown.

317 Our screening also led to the identification of FNLLGLLA\_01127, the homolog of *B.*  
318 *subtilis* YqeK, a putative phosphatase required for pellicle formation and the development of  
319 biofilm (18). FNLLGLLA\_01127/yqeK is found in a cluster of genes (namely *obg*, *yhbY*, *proB*,  
320 *proA*, *nadD*, *yqeK*, *lytR*, and *rsfS*), whose synteny is very well conserved among Negativicutes.  
321 This cluster, or part of it, is also well conserved in almost all Firmicutes genomes we analyzed,  
322 both monoderm and diderm, as well as in members of other diderm phyla phylogenetically  
323 close to the Firmicutes, notably Deinococcus-Thermus (Figure S5 and S6, DataSet 2).  
324 *Staphylococcus aureus* YqeK was recently shown to be a nucleotidase hydrolyzing  
325 diadenosine-tetraphosphate (Ap4A) into ADP (47). In *Pseudomonas fluorescens*, an increased  
326 level of Ap4A increases cyclic-di-GMP concentration and enhances cell-surface exposure of a  
327 large adhesin LapA, thus inducing biofilm formation (48). c-di-GMP regulates biofilm  
328 formation by modulating production of a variety cell-surface appendages or exopolysaccharides  
329 in both monoderm and diderm bacteria (49–53). Interestingly, *B. subtilis* YqeK induces the

330 *epsA-O* operon, involved in the production of biofilm matrix-forming polysaccharides (54).  
331 Deletion of *V. parvula* *FNLLGLLA\_01127* only led to a minor decrease in biofilm formation in  
332 96-well plate, but a strong increase in continuous-flow biofilm formation that was dependent  
333 on the presence of the cluster of trimeric autotransporters. While we cannot exclude a direct  
334 effect on the adhesins of the cluster, more likely *FNLLGLLA\_01127* participates to the  
335 production/regulation of an unknown exopolysaccharide, which, contrary to *B. subtilis*, would  
336 interfere with the function or exposure of the adhesins of the cluster rather than favor  
337 community development. *FNLLGLLA\_01127* and its homologue YqeK are both involved in  
338 biofilm formation, but the presence or absence of an outer membrane containing adhesins  
339 changes the outcome of the HD phosphatase-mediated regulation of biofilm.

340

341 In this study we have shown that classical diderm trimeric autotransporters and a potential  
342 nucleotidase, conserved both in monoderms and diderms, with possible exopolysaccharides  
343 regulatory functions are crucial for adhesion both between cells and/or to surfaces in the diderm  
344 Firmicute *V. parvula*. Our work also underscores the rapid evolution of a diverse arsenal of  
345 trimeric autotransporters in the *Veillonella* genus, both in numbers and size, probably by  
346 efficient recombination favored by gene clustering, allowing rapid adaptation to changing  
347 environments. Taken together, our results suggest a complex interplay at the surface of *V.*  
348 *parvula* between different cell surface structures that may have co-evolved for a long time in  
349 these atypical Firmicutes. Much remains to be discovered on the regulatory circuits controlling  
350 these adhesion factors and their role in diderm Firmicutes biology.

351

352

## 353 MATERIALS AND METHODS

354

### 355 Bioinformatic analyses

356 The *V. parvula* SKV38 genome was annotated using PROKKA (55) and complementary  
357 analyses were performed with RAST (56). Genetic comparison figures were generated with  
358 BRIG (57) or with SnapGene (GSL Biotech, [www.snapgene.com](http://www.snapgene.com)) for visualization of genetic  
359 organization. The SKV38 annotated genome sequence was deposited in the ENA (European  
360 Nucleotide Archive) under the accession number ERZ1303164. Average Nucleotide Identity  
361 (ANI) was calculated using the following web tool <http://enve-omics.ce.gatech.edu/ani/> (58).

362 For protein domain visualization, PFAM domains ([pfam.xfam.org](http://pfam.xfam.org), Pfam 32.0. (44)) were  
363 detected using HMMER (59). Domains with an e-value lower than  $10^{-3}$  were kept and, in case  
364 of overlapping domains, the domain having the best e-value was kept. Presence of C-terminal  
365 coils structure was determined using the COILS program ([https://embnet.vital-  
366 it.ch/software/COILS\\_form.html](https://embnet.vital-it.ch/software/COILS_form.html)) (60).

367 For phylogenetic analyses, a local databank of the currently available 133 Negativicutes  
368 genomes was assembled and searched for InfB, RpoB and RpoC protein sequences using  
369 HMMER (59). Sequences were aligned using MAFFT (61), trimmed using BMGE with default  
370 parameters (62), concatenated, and used to generate a tree using IQTREE (63) with the LG+R5  
371 model and ultrafast bootstrap approximation with 1000 replicates of the original dataset. Only  
372 the Veillonellaceae part of the tree was explored, the rest serving as an outgroup to root the tree.  
373 Different adhesin families were searched in the same local databank, using HMMER (59) and  
374 plotted onto the tree. *Veillonella* adhesin cluster synteny was analyzed using Easyfig for eight  
375 selected species (64) using tblastx.

376

### 377 Strains and growth conditions

378 Bacterial strains and plasmids are listed in Table 2. *V. parvula* was grown in either Brain Heart  
379 infusion medium (Bacto Brain Heart infusion, Difco) supplemented with 0.1 % L-cysteine and  
380 0.6 % sodium DL-lactate (BHILC) or SK medium (10 g L<sup>-1</sup> tryptone (Difco), 10 g L<sup>-1</sup> yeast  
381 extract (Difco), 0.4 g L<sup>-1</sup> disodium phosphate, 2 g L<sup>-1</sup> sodium chloride, and 10 mL L<sup>-1</sup> 60 %  
382 w/v sodium DL-lactate, described in (17)) and incubated at 37°C in anaerobic conditions in  
383 anaerobic bags (GENbag anaero, Biomerieux, ref. 45534) or in a C400M Ruskinn anaerobic-

384 microaerophilic station. *Escherichia coli* was grown in Lysogeny Broth (LB) (Corning)  
385 medium under aerobic conditions at 37°C. 20 mg L<sup>-1</sup> chloramphenicol (Cm), 200 mg L<sup>-1</sup>  
386 erythromycin (Ery) or 2.5 mg L<sup>-1</sup> tetracycline (Tc) were added to *V. parvula* cultures, 100 mg  
387 L<sup>-1</sup> carbenicillin (Cb) or 5 mg L<sup>-1</sup> tetracycline (Tc) were added to *E. coli* cultures when needed.  
388 100 µg L<sup>-1</sup> anhydrotetracycline (aTc) was added to induce the pTet promoter unless stated  
389 otherwise. All chemicals were purchased from Sigma-Aldrich unless stated otherwise.

390

### 391 **Natural transformation**

392 Cells were resuspended in 1 mL SK media adjusted to 0.4-0.8 OD<sub>600</sub> and 10 µL were dotted on  
393 SK-agar petri dishes. On each drop, 0.5-1 µg plasmid or 75-200 ng µL<sup>-1</sup> linear dsDNA PCR  
394 product was added, or water for the negative control. The plates were incubated 48 hours. The  
395 biomass was resuspended in 500 µL SK medium and plated on SK-agar supplemented with the  
396 corresponding antibiotic and incubated for another 48 hours. Colonies were streaked on fresh  
397 selective plates and the correct integration of the construct was confirmed by PCR and  
398 sequencing.

399

### 400 **Random mariner transposon mutagenesis**

401 Plasmid pRPF215, described for *Clostridium* mutagenesis (Addgene 106377) (20) was  
402 transformed into *V. parvula* SKV38 by natural transformation and selected on Cm  
403 supplemented SK-agar medium. An overnight culture of *V. parvula* SKV38-pRPF215 in  
404 BHILC was then diluted to 0.1 OD<sub>600</sub> in the same media, supplemented with aTc and grown 5  
405 hours to induce the transposase. After induction, the culture was diluted and plated on BHILC  
406 supplemented with Ery and aTc for selection and incubated for 48 hours. From the resulting  
407 colonies, 940 were inoculated in Greiner Bio-one polystyrene flat-bottom 96-well plates  
408 (655101) and grown in BHILC supplemented with either Ery and aTc, or Cm, to confirm both  
409 the presence of the transposon and the loss of pRPF215 and then kept in 15 % glycerol at -  
410 80°C. Selected transposon mutants were grown overnight and the genomic DNA was harvested  
411 using DNeasy blood and tissue kit (Qiagen). The genomic DNA was then sent for whole  
412 genome sequencing at the Mutualized platform for Microbiology of Institut Pasteur.

413

### 414 **Cloning-independent allelic exchange mutagenesis**

415 Site-directed mutagenesis of *V. parvula* SK38 strain was performed as described by Knapp and  
416 colleagues (17). Briefly, 1-Kb regions upstream and downstream the target sequence and *V.*  
417 *atypica* tetracycline resistance cassette (*tetM* in pBSJL2) or *catP* resistance cassette from *C.*  
418 *difficile* (*catP* in pRPF185, Addgene 106367, from (65)) were PCR-amplified with overlapping  
419 primers using Phusion Flash High-Fidelity PCR Master-Mix (Thermo Scientific, F548). PCR  
420 products were used as templates in a second PCR round using only the external primers that  
421 generated a linear dsDNA with the tetracycline resistance cassette flanked by the upstream and  
422 downstream sequences. This construct was transformed into *V. parvula* by natural  
423 transformation and its integration into the genome was selected by plating on Tc or Cm  
424 supplemented medium. Positive candidates were further confirmed by a set of PCRs and  
425 sequencing around the site. Primers used in this study are listed in Table S1.

426

## 427 **Complementation**

428 We replaced the tetracycline resistance gene and its *gyrA* promoter of the shuttle vector pBSJL2  
429 by a chloramphenicol resistance gene,  $P_{cat}:cat$  from pRPF185 by Gibson assembly. Briefly, the  
430 inserts and the plasmids were PCR amplified and then mixed with Gibson master mix 2x  
431 (100 $\mu$ L 5X ISO Buffer, 0.2  $\mu$ L 10,000 U/mL T5 exonuclease (NEB #M0363S), 6.25  $\mu$ L 2,000  
432 U/mL Phusion HF polymerase (NEB #M0530S), 50  $\mu$ L 40,000 U/mL Taq DNA ligase (NEB  
433 #M0208S), 87  $\mu$ L dH<sub>2</sub>O for 24 reactions) and incubated at 50°C for 30-60 min.

434 The resulting plasmid pBSJL2-*cat* was digested by Fastdigest *Bam*HI (Thermo scientific) and  
435 the band obtained was purified from agarose gel using QIAquick gel extraction kit (Qiagen) to  
436 be used as linear plasmid in a second Gibson assembly. The genes and the  $P_{mdh}$  promoter of *V.*  
437 *parvula* SKV38 were amplified by PCR using PhusionFlash Master-mix and cloned in pBSJL2-  
438 *cat* using Gibson assembly. The mix was then transformed in *E. coli* DH5 $\alpha$  and plated on LB  
439 with carbenicillin. The plasmid was harvested by miniprep using QIAprep spin miniprep kit  
440 (Qiagen) and transformed in *V. parvula* as described above.

441 Alternatively, the anhydrotetracycline inducible expression cassette of pRPF185, hereafter  
442 referred to as *pTet*, (Addgene 106367, (65)) was inserted along with a chloramphenicol marker  
443 right before the ATG of the target gene, following the procedure described above for cloning-  
444 independent allelic exchange mutagenesis. The functionality of *pTet* in *V. parvula* was  
445 previously verified using measurement of the aTc dependent  $\beta$ -glucuronidase activity generated  
446 by the presence of pRPF185 transformed in *V. parvula* SKV38 (Figure S4).

447



#### 448 **Biofilm formation in 96-well microtiter plates**

449 Overnight cultures in BHILC medium were diluted to 0.05 OD<sub>600</sub> and transferred to three  
450 Greiner Bio-one polystyrene flat bottom 96-well plates adding 150 µL per well. After 24 hours  
451 of static incubation, one of the three plates was resuspended by pipetting to measure OD<sub>600</sub>  
452 using a TECAN Infinite-M200-Pro spectrophotometer. The two other plates were used for  
453 coloration: cultures were removed by pipetting carefully the supernatant out and biofilms fixed  
454 with 150 µL Bouin solution (HT10132, Sigma-Aldrich) for 15 minutes. Bouin solution was  
455 removed by inversion and the biofilms were washed once in water. The biofilms were stained  
456 with 150 µL crystal violet 1 % (V5265, Sigma-Aldrich) for 15 minutes without shaking, then  
457 washed in water twice and left to dry. All washes were made by flicking of the plate. After  
458 drying the plate, crystal violet was dissolved with 200 µL absolute ethanol and transferred to a  
459 clean 96-well plate for OD<sub>620</sub> measurement (TECAN Infinite-M200-Pro spectrophotometer).

460

#### 461 **Biofilm formation in microfermentor**

462 Continuous flow non-bubbled microfermentor containing a removable spatula were used as  
463 described in (66, 67) (see <https://research.pasteur.fr/en/tool/biofilm-microfermenters/>). Briefly,  
464 a glass spatula was dipped in an overnight culture diluted to 0.5 OD<sub>600</sub> in 15 mL BHILC for 15  
465 minutes and returned to the fermentor. Biofilm was grown on the spatula for 48 hours at 37°C.  
466 BHILC was constantly supplied through a peristaltic pump at 4 rpm. During the last hour, the  
467 speed was increased to 10 rpm to remove planktonic bacteria. A mix of filtered 90% nitrogen/5%  
468 hydrogen/5% carbon dioxide was also constantly supplied to maintain anaerobic condition.  
469 After 48 hours of growth, the spatula was removed, and the biofilm was resuspended by  
470 vortexing in 15 mL BHILC. We measured OD<sub>600</sub> of the resuspended biofilms with Smart Spec  
471 Plus spectrophotometer (BioRad).

472

#### 473 **Aggregation curve**

474 Overnight cultures were diluted to 0.8 OD<sub>600</sub> in Brain-heart infusion (BHI) media in semi-micro  
475 spectrophotometry cuvette (Fisherbrand) and left to sediment on the bench in presence of  
476 oxygen, so no growth should occur. OD<sub>600</sub> was measured every hour in a single point of the  
477 cuvette using SmartSpec spectrophotometer (BioRad).

478

#### 479 **Initial adhesion on glass**

480 Glass spatula from microfermentor (described above) were dipped in overnight cultures diluted

481 to 0.5 OD<sub>600</sub> in 15 mL Brain-Heart Infusion (BHI) media for 30 minutes to let bacteria adhere.  
482 The spatulas were washed once in 15 mL BHI by submersion and the adhering bacteria were  
483 resuspended in 15 mL clean BHI by vortexing. The culture used for inoculation, as well as the  
484 resuspended bacteria were serially diluted and plated on SK-agar plate for colony forming unit  
485 (CFU) counting.

486

#### 487 **Statistical analysis**

488 Statistical analysis was performed using either R and Rstudio software or GraphPad Prism8  
489 (GraphPad software, Inc.). We used only non-parametric test, and when applicable corrected  
490 for multiple testing. For microfermentor experiments, 4 replicates of each condition were used.  
491 For all the other experiments, at least 6 biological replicates in at least 2 independent experiment  
492 were used. A cut-off of p-value of 5% was used for all tests. \* p<0.05; \*\* p<0.05; \*\*\* p<0.005.  
493 For growth curve analyses, we computed the growth rate and carrying capacity of each  
494 biological replicates using Growthcurver 0.3.0 package in R and we performed a Mann-  
495 Whitney test comparing both parameters for each mutant to the corresponding WT.

496

497

## 498 **COMPETING FINANCIAL INTERESTS**

499 The authors declare no competing financial interests.

500

501

## 502 **ACKNOWLEDGEMENTS**

503 We thank Justin Merritt for providing *V. parvula* SKV38 strain, Bruno Dupuy and Robert P.  
504 Fagan for providing the different *Clostridium* plasmids, Pierre Simon Garcia for help with the  
505 Figure 5 preparation, Daniela Megrian Nuñez and Panagiotis Adam for the genome databank  
506 preparation and the platforms France Génomique and IBISA. We wish to acknowledge funding  
507 from the French National Research Agency (ANR) (Fir-OM ANR-16-CE12-0010), from the  
508 Institut Pasteur “Programmes Transversaux de Recherche” (PTR 39-16), from the French  
509 government's Investissement d'Avenir Program, Laboratoire d'Excellence "Integrative Biology  
510 of Emerging Infectious Diseases" (grant n°ANR-10-LABX-62-IBEID) and from the Fondation  
511 pour la Recherche Médicale (grant DEQ20180339185). N.B. was supported by a MENESR  
512 (Ministère Français de l'Éducation Nationale, de l'Enseignement Supérieur et de la Recherche)  
513 fellowship. A.J.F. was supported by a PRESTIGE program from Campus France.

514

## 515 **AUTHORS CONTRIBUTIONS**

516 C.B., N.B. and A.J.F. designed the experiments. N.B., A.J.F., E.B. and L.M. performed the  
517 experiments. J.W., N.T., and T.C. carried out all genomics and phylogeny analyses under the  
518 supervision of S.G. N.B., C.B. and A.J.F. wrote the paper, with contribution from S.G., J.W.,  
519 T.C. and JM.G. All authors have read and approved the manuscript.

520

521

522 **REFERENCES**

- 523 1. Megrian D, Taib N, Witwinowski J, Beloin C, Gribaldo S. 2020. One or two  
524 membranes? Diderm Firmicutes challenge the Gram-positive/Gram-negative divide.  
525 Mol Microbiol mmi.14469.
- 526 2. Veillon A, Zuber A. 1898. Recherches sur quelques microbes strictement anaérobies et  
527 leur rôle en pathologie humaine. Arch Med Exp Anat Pathol 10.
- 528 3. Dewhirst FE, Chen T, Izard J, Paster BJ, Tanner ACR, Yu W-H, Lakshmanan A, Wade  
529 WG. 2010. The human oral microbiome. J Bacteriol 192:5002–17.
- 530 4. van den Bogert B, Erkus O, Boekhorst J, de Goffau M, Smid EJ, Zoetendal EG,  
531 Kleerebezem M. 2013. Diversity of human small intestinal *Streptococcus* and  
532 *Veillonella* populations. FEMS Microbiol Ecol 85:376–388.
- 533 5. Aujoulat F, Roudière L, Picaud J-C, Jacquot A, Filleron A, Neveu D, Baum T-P,  
534 Marchandin H, Jumas-Bilak E. 2014. Temporal dynamics of the very premature infant  
535 gut dominant microbiota. BMC Microbiol 14:325.
- 536 6. Arrieta M-C, Stiemsma LT, Dimitriu PA, Thorson L, Russell S, Yurist-Doutsch S,  
537 Kuzeljevic B, Gold MJ, Britton HM, Lefebvre DL, Subbarao P, Mandhane P, Becker  
538 A, McNagny KM, Sears MR, Kollmann T, Investigators the CS, Mohn WW, Turvey  
539 SE, Finlay BB. 2015. Early infancy microbial and metabolic alterations affect risk of  
540 childhood asthma. Sci Transl Med 7:307ra152-307ra152.
- 541 7. Kolenbrander PE. 2011. Multispecies communities: Interspecies interactions influence  
542 growth on saliva as sole nutritional source, p. 49–54. In International Journal of Oral  
543 Science.
- 544 8. Periasamy S, Kolenbrander PE. 2010. Central role of the early colonizer *Veillonella* sp.  
545 in establishing multispecies biofilm communities with initial, middle, and late  
546 colonizers of enamel. J Bacteriol 192:2965–72.
- 547 9. Li J, Chen P, Li J, Gao X, Chen X, Chen J. 2017. A new treatment of sepsis caused by  
548 *veillonella parvula* : A case report and literature review. J Clin Pharm Ther 42:649–  
549 652.
- 550 10. Hirai J, Yamagishi Y, Kinjo T, Hagihara M, Sakanashi D, Suematsu H, Fujita J,  
551 Mikamo H. 2016. Osteomyelitis caused by *Veillonella* species: Case report and review  
552 of the literature. J Infect Chemother 22:417–420.

- 553 11. Gouze H, Noussair L, Padovano I, Salomon E, de Laroche M, Duran C, Felter A,  
554 Carlier R, Breban M, Dinh A. 2019. *Veillonella parvula* spondylodiscitis. *Médecine*  
555 *Mal Infect* 49:54–58.
- 556 12. Hyo Y, Fukushima H, Harada T, Hara H. 2019. Nasal septal abscess caused by  
557 anaerobic bacteria of oral flora. *Auris Nasus Larynx* 46:147–150.
- 558 13. Wellens L, Casteels I, Huygens M. 2019. *Veillonella parvula* periorbital cellulitis: an  
559 unusual pathogen causing a common clinical sign. *GMS Ophthalmol cases* 9:Doc17.
- 560 14. Gronow S, Welnitz S, Lapidus A, Nolan M, Ivanova N, del Rio TG, Copeland A, Chen  
561 F, Tice H, Pitluck S, Cheng JF, Saunders E, Brettin T, Han C, Detter JC, Bruce D,  
562 Goodwin L, Land M, Hauser L, Chang YJ, Jeffries CD, Pati A, Mavromatis K,  
563 Mikhailova N, Chen A, Palaniappan K, Chain P, Rohde M, Göker M, Bristow J, Eisen  
564 JA, Markowitz V, Hugenholtz P, Kyrpides NC, Klenk HP, Lucas S. 2010. Complete  
565 genome sequence of *Veillonella parvula* type strain (Te3 T). *Stand Genomic Sci* 2:57–  
566 65.
- 567 15. Poppleton DI, Duchateau M, Hourdel V, Matondo M, Flechsler J, Klingl A, Beloin C,  
568 Gribaldo S. 2017. Outer membrane proteome of *Veillonella parvula*: A diderm  
569 firmicute of the human microbiome. *Front Microbiol* 8:1–17.
- 570 16. Berne C, Ducret A, Hardy GG, Brun Y V. 2015. Adhesins Involved in Attachment to  
571 Abiotic Surfaces by Gram-Negative Bacteria. *Microbiol Spectr* 3.
- 572 17. Knapp S, Brodal C, Peterson J, Qi F, Kreth J, Merritt J. 2017. Natural Competence Is  
573 Common among Clinical Isolates of *Veillonella parvula* and Is Useful for Genetic  
574 Manipulation of This Key Member of the Oral Microbiome. *Front Cell Infect*  
575 *Microbiol* 7:1–12.
- 576 18. Branda SS, González-Pastor JE, Dervyn E, Ehrlich SD, Losick R, Kolter R. 2004.  
577 Genes involved in formation of structured multicellular communities by *Bacillus*  
578 *subtilis*. *J Bacteriol* 186:3970–9.
- 579 19. Desvillechabrol D, Bouchier C, Kennedy S, Cokelaer T. 2018. Sequana Coverage:  
580 Detection and Characterization of Genomic Variations using Running Median and  
581 Mixture Models. *Gigascience* 7.
- 582 20. Dembek M, Barquist L, Boinett CJ, Cain AK, Mayho M, Lawley TD, Fairweather NF,  
583 Fagan RP. 2015. High-Throughput Analysis of Gene Essentiality and Sporulation in

- 584 Clostridium difficile. MBio 6:e02383.
- 585 21. Łyskowski A, Leo JC, Goldman A. 2011. Structure and Biology of Trimeric  
586 Autotransporter Adhesins, p. 143–158. *In* Advances in experimental medicine and  
587 biology.
- 588 22. Ruiz-Ranwez V, Posadas DM, Estein SM, Abdian PL, Martin FA, Zorreguieta A.  
589 2013. The BtaF trimeric autotransporter of Brucella suis is involved in attachment to  
590 various surfaces, resistance to serum and virulence. PLoS One 8:e79770.
- 591 23. Zhou P, Liu J, Merritt J, Qi F. 2015. A YadA-like autotransporter, Hag1 in Veillonella  
592 atypica is a multivalent hemagglutinin involved in adherence to oral streptococci,  
593 Porphyromonas gingivalis, and human oral buccal cells. Mol Oral Microbiol 30:269–  
594 279.
- 595 24. Trunk T, S. Khalil H, C. Leo J. 2018. Bacterial autoaggregation. AIMS Microbiol  
596 4:140–164.
- 597 25. Bongrand C, Ruby EG. 2019. The impact of Vibrio fischeri strain variation on host  
598 colonization. Curr Opin Microbiol 50:15–19.
- 599 26. Bonazzi D, Lo Schiavo V, Machata S, Djafer-Cherif I, Nivoit P, Manriquez V,  
600 Tanimoto H, Husson J, Henry N, Chaté H, Voituriez R, Duménil G. 2018. Intermittent  
601 Pili-Mediated Forces Fluidize Neisseria meningitidis Aggregates Promoting Vascular  
602 Colonization. Cell 174:143-155.e16.
- 603 27. Klemm P, Vejborg RM, Sherlock O. 2006. Self-associating autotransporters, SAATs:  
604 Functional and structural similarities. Int J Med Microbiol 296:187–195.
- 605 28. Ageorges V, Schiavone M, Jubelin G, Caccia N, Ruiz P, Chafsey I, Bailly X, Dague E,  
606 Leroy S, Paxman J, Heras B, Chaucheyras-Durand F, Rossiter AE, Henderson IR,  
607 Desvaux M. 2019. Differential homotypic and heterotypic interactions of antigen 43  
608 (Ag43) variants in autotransporter-mediated bacterial autoaggregation. Sci Rep  
609 9:11100.
- 610 29. Wells TJ, Sherlock O, Rivas L, Mahajan A, Beatson SA, Torpdahl M, Webb RI,  
611 Allsopp LP, Gobius KS, Gally DL, Schembri MA. 2008. EhaA is a novel  
612 autotransporter protein of enterohemorrhagic Escherichia coli O157:H7 that contributes  
613 to adhesion and biofilm formation. Environ Microbiol 10:589–604.
- 614 30. Totsika M, Wells TJ, Beloin C, Valle J, Allsopp LP, King NP, Ghigo J-M, Schembri

- 615 MA. 2012. Molecular characterization of the EhaG and UpaG trimeric autotransporter  
616 proteins from pathogenic *Escherichia coli*. *Appl Environ Microbiol* 78:2179–89.
- 617 31. Valle J, Mabbett AN, Ulett GC, Toledo-Arana A, Wecker K, Totsika M, Schembri  
618 MA, Ghigo J-M, Beloin C. 2008. UpaG, a New Member of the Trimeric  
619 Autotransporter Family of Adhesins in Uropathogenic *Escherichia coli*. *J Bacteriol*  
620 190:4147–4161.
- 621 32. Paton AW, Srimanote P, Woodrow MC, Paton JC. 2001. Characterization of Saa, a  
622 novel autoagglutinating adhesin produced by locus of enterocyte effacement-negative  
623 Shiga-toxigenic *Escherichia coli* strains that are virulent for humans. *Infect Immun*  
624 69:6999–7009.
- 625 33. Leo JC, Lyskowski A, Hattula K, Hartmann MD, Schwarz H, Butcher SJ, Linke D,  
626 Lupas AN, Goldman A. 2011. The Structure of *E. coli* IgG-Binding Protein D Suggests  
627 a General Model for Bending and Binding in Trimeric Autotransporter Adhesins.  
628 *Structure* 19:1021–1030.
- 629 34. Beloin C, Michaelis K, Lindner K, Landini P, Hacker J, Ghigo J-M, Dobrindt U. 2006.  
630 The transcriptional antiterminator RfaH represses biofilm formation in *Escherichia*  
631 *coli*. *J Bacteriol* 188:1316–31.
- 632 35. Korea C-G, Badouraly R, Prevost M-C, Ghigo J-M, Beloin C. 2010. *Escherichia coli*  
633 K-12 possesses multiple cryptic but functional chaperone-usher fimbriae with distinct  
634 surface specificities. *Environ Microbiol* 12:1957–1977.
- 635 36. Hasman H, Chakraborty T, Klemm P. 1999. Antigen-43-mediated autoaggregation of  
636 *Escherichia coli* is blocked by fimbriation. *J Bacteriol* 181:4834–41.
- 637 37. Schembri MA, Dalsgaard D, Klemm P. 2004. Capsule shields the function of short  
638 bacterial adhesins. *J Bacteriol* 186:1249–57.
- 639 38. Hughes C V, Andersen RN, Kolenbrander PE. 1992. Characterization of *Veillonella*  
640 *atypica* PK1910 adhesin-mediated coaggregation with oral *Streptococcus* spp. *Infect*  
641 *Immun* 60:1178–86.
- 642 39. Mashima I, Nakazawa F. 2015. Interaction between *Streptococcus* spp. and *Veillonella*  
643 *tobetsuensis* in the early stages of oral biofilm formation. *J Bacteriol. American Society*  
644 *for Microbiology*.
- 645 40. Mashima I, Nakazawa F. 2014. The influence of oral *Veillonella* species on biofilms

- 646           formed by *Streptococcus* species. *Anaerobe* 28:54–61.
- 647   41.   Periasamy S, Kolenbrander PE. 2010. Central role of the early colonizer *Veillonella* sp.  
648           in establishing multispecies biofilm communities with initial, middle, and late  
649           colonizers of enamel. *J Bacteriol* 192:2965–2972.
- 650   42.   Hughes C V, Kolenbrander PE, Andersen RN, Moore L V. 1988. Coaggregation  
651           properties of human oral *Veillonella* spp.: relationship to colonization site and oral  
652           ecology. *Appl Environ Microbiol* 54:1957–63.
- 653   43.   Wells TJ, Totsika M, Schembri MA. 2010. Autotransporters of *Escherichia coli*: A  
654           sequence-based characterization. *Microbiology* 156:2459–2469.
- 655   44.   El-Gebali S, Mistry J, Bateman A, Eddy SR, Luciani A, Potter SC, Qureshi M,  
656           Richardson LJ, Salazar GA, Smart A, Sonnhammer ELL, Hirsh L, Paladin L, Piovesan  
657           D, Tosatto SCE, Finn RD. 2019. The Pfam protein families database in 2019. *Nucleic  
658           Acids Res* 47.
- 659   45.   Mesnage S, Fontaine T, Mignot T, Delepierre M, Mock M, Fouet A. 2000. Bacterial  
660           SLH domain proteins are non-covalently anchored to the cell surface via a conserved  
661           mechanism involving wall polysaccharide pyruvylation. *EMBO J* 19:4473–4484.
- 662   46.   Park JS, Lee WC, Yeo KJ, Ryu K-S, Kumarasiri M, Heseck D, Lee M, Mobashery S,  
663           Song JH, Kim S Il, Lee JC, Cheong C, Jeon YH, Kim H-Y. 2012. Mechanism of  
664           anchoring of OmpA protein to the cell wall peptidoglycan of the gram-negative  
665           bacterial outer membrane. *FASEB J* 26:219–228.
- 666   47.   Minazzato G, Gasparrini M, Amici A, Cianci M, Mazzola F, Orsomando G, Sorci L,  
667           Raffaelli N. 2020. Functional characterization of COG1713 (YqeK) as a novel  
668           diadenosine tetraphosphate hydrolase family. *J Bacteriol* JB.00053-20.
- 669   48.   Monds RD, Newell PD, Wagner JC, Schwartzman JA, Lu W, Rabinowitz JD, O’Toole  
670           GA. 2010. Di-adenosine tetraphosphate (Ap<sub>4</sub>A) metabolism impacts biofilm formation  
671           by *Pseudomonas fluorescens* via modulation of c-di-GMP-dependent pathways. *J  
672           Bacteriol* 192:3011–3023.
- 673   49.   Gundlach J, Rath H, Herzberg C, Mäder U, Stülke J. 2016. Second Messenger  
674           Signaling in *Bacillus subtilis*: Accumulation of Cyclic di-AMP Inhibits Biofilm  
675           Formation. *Front Microbiol* 7:804.
- 676   50.   Peng X, Zhang Y, Bai G, Zhou X, Wu H. 2016. Cyclic di-AMP mediates biofilm



- 677 formation. *Mol Microbiol* 99:945–959.
- 678 51. Townsley L, Yannarell SM, Huynh TN, Woodward JJ, Shank EA. 2018. Cyclic di-  
679 AMP Acts as an Extracellular Signal That Impacts *Bacillus subtilis* Biofilm Formation  
680 and Plant Attachment. *MBio* 9.
- 681 52. Jenal U, Reinders A, Lori C. 2017. Cyclic di-GMP: second messenger extraordinaire.  
682 *Nat Rev Microbiol* 15:271–284.
- 683 53. Krasteva PV, Sondermann H. 2017. Versatile modes of cellular regulation via cyclic  
684 dinucleotides. *Nat Chem Biol* 13:350–359.
- 685 54. Yan F, Yu Y, Wang L, Luo Y, Guo J-H, Chai Y. 2016. The comER Gene Plays an  
686 Important Role in Biofilm Formation and Sporulation in both *Bacillus subtilis* and  
687 *Bacillus cereus*. *Front Microbiol* 7:1025.
- 688 55. Seemann T. 2014. Prokka: rapid prokaryotic genome annotation. *Bioinformatics*  
689 30:2068–2069.
- 690 56. Overbeek R, Olson R, Pusch GD, Olsen GJ, Davis JJ, Disz T, Edwards RA, Gerdes S,  
691 Parrello B, Shukla M, Vonstein V, Wattam AR, Xia F, Stevens R. 2014. The SEED  
692 and the Rapid Annotation of microbial genomes using Subsystems Technology  
693 (RAST). *Nucleic Acids Res* 42:D206–D214.
- 694 57. Alikhan N-F, Petty NK, Ben Zakour NL, Beatson SA. 2011. BLAST Ring Image  
695 Generator (BRIG): simple prokaryote genome comparisons. *BMC Genomics* 12:402.
- 696 58. Rodriguez-R L, Konstantinidis K. 2016. The enveomics collection: a toolbox for  
697 specialized analyses of microbial genomes and metagenomes.
- 698 59. Johnson LS, Eddy SR, Portugaly E. 2010. Hidden Markov model speed heuristic and  
699 iterative HMM search procedure. *BMC Bioinformatics* 11:431.
- 700 60. Lupas A, Dyke M Van, Stock J. 1991. Predicting Coiled Coils from Protein Sequences.  
701 *Science* (80- ). American Association for the Advancement of Science.
- 702 61. Katoh K, Standley DM. 2013. MAFFT Multiple Sequence Alignment Software  
703 Version 7: Improvements in Performance and Usability. *Mol Biol Evol* 30:772–780.
- 704 62. Criscuolo A, Gribaldo S. 2010. BMGE (Block Mapping and Gathering with Entropy):  
705 a new software for selection of phylogenetic informative regions from multiple  
706 sequence alignments. *BMC Evol Biol* 10:210.

- 707 63. Nguyen L-T, Schmidt HA, von Haeseler A, Minh BQ. 2015. IQ-TREE: A Fast and  
708 Effective Stochastic Algorithm for Estimating Maximum-Likelihood Phylogenies. *Mol*  
709 *Biol Evol* 32:268–274.
- 710 64. Sullivan MJ, Petty NK, Beatson SA. 2011. Easyfig: a genome comparison visualizer.  
711 *Bioinformatics* 27:1009–1010.
- 712 65. Fagan RP, Fairweather NF. 2011. *Clostridium difficile* Has Two Parallel and Essential  
713 Sec Secretion Systems. *J Biol Chem* 286:27483–27493.
- 714 66. Ghigo J-M. 2001. Natural conjugative plasmids induce bacterial biofilm development.  
715 *Nature* 412:442–445.
- 716 67. Beloin C, Valle J, Latour-Lambert P, Faure P, Kzreminski M, Balestrino D, Haagensen  
717 JAJ, Molin S, Prensier G, Arbeille B, Ghigo J-M. 2003. Global impact of mature  
718 biofilm lifestyle on *Escherichia coli* K-12 gene expression. *Mol Microbiol* 51:659–674.
- 719 68. Soutourina OA, Monot M, Boudry P, Saujet L, Pichon C, Sismeiro O, Semenova E,  
720 Severinov K, Le Bouguenec C, Coppée JY, Dupuy B, Martin-Verstraete I. 2013.  
721 Genome-Wide Identification of Regulatory RNAs in the Human Pathogen *Clostridium*  
722 *difficile*. *PLoS Genet* 9.
- 723 69. Liu J, Xie Z, Merritt J, Qi F. 2012. Establishment of a tractable genetic transformation  
724 system in *Veillonella* spp. *Appl Environ Microbiol* 78:3488–91.
- 725 70. Aziz RK, Bartels D, Best A, DeJongh M, Disz T, Edwards RA, Formsma K, Gerdes S,  
726 Glass EM, Kubal M, Meyer F, Olsen GJ, Olson R, Osterman AL, Overbeek RA,  
727 McNeil LK, Paarmann D, Paczian T, Parrello B, Pusch GD, Reich C, Stevens R,  
728 Vassieva O, Vonstein V, Wilke A, Zagnitko O. 2008. The RAST Server: Rapid  
729 annotations using subsystems technology. *BMC Genomics* 9.
- 730 71. Overbeek R, Olson R, Pusch GD, Olsen GJ, Davis JJ, Disz T, Edwards RA, Gerdes S,  
731 Parrello B, Shukla M, Vonstein V, Wattam AR, Xia F, Stevens R. 2014. The SEED  
732 and the Rapid Annotation of microbial genomes using Subsystems Technology  
733 (RAST). *Nucleic Acids Res* 42:D206-14.
- 734 72. Brettin T, Davis JJ, Disz T, Edwards RA, Gerdes S, Olsen GJ, Olson R, Overbeek R,  
735 Parrello B, Pusch GD, Shukla M, Thomason JA, Stevens R, Vonstein V, Wattam AR,  
736 Xia F. 2015. RASTtk: A modular and extensible implementation of the RAST  
737 algorithm for building custom annotation pipelines and annotating batches of genomes.

738            Sci Rep 5.

739

740

741 **TABLES**

742

743

| Locus tag      | PROKKA Gene name     | Genome position |           | Gene size (kb) | Strand  | Description                                       | DSM2008 homolog       | Name | Class |
|----------------|----------------------|-----------------|-----------|----------------|---------|---------------------------------------------------|-----------------------|------|-------|
| FNLLGLLA_00032 | prn 1                | 39,354          | 41,723    | 2,37           | forward | Autotransporter                                   | fusion Vpar_0036-0037 | VmaA | Va    |
| FNLLGLLA_00034 | btaE 1               | 42,345          | 43,754    | 1,41           | reverse | Trimeric Autotransporter: YadA like               | Vpar_0039             | VtaB | Vc    |
| FNLLGLLA_00035 | hypothetical protein | 44,146          | 45,189    | 1,04           | forward | Autotransporter (partial)                         | Vpar_0040             |      | Ve    |
| FNLLGLLA_00036 | hypothetical protein | 45,453          | 46,883    | 1,431          | forward | none                                              | split Vpar_0041       |      | ?     |
| FNLLGLLA_00037 | omp-alpha            | 46,91           | 47,878    | 969            | forward | Trimeric Autotransporter/ S-layer homology domain | split Vpar_0041       |      | Vc?   |
| FNLLGLLA_00038 | upaG 1               | 48,397          | 56,829    | 8,433          | forward | Trimeric Autotransporter: YadA like               | Vpar_0042             | VtaC | Vc    |
| FNLLGLLA_00040 | btaE 2               | 57,966          | 59,84     | 1,875          | forward | Trimeric Autotransporter: YadA like (Partial)     | split Vpar_0048       |      | ?     |
| FNLLGLLA_00041 | ata 1                | 59,837          | 63,463    | 3,627          | forward | Trimeric Autotransporter: YadA like               | split Vpar_0048       |      | Vc?   |
| FNLLGLLA_00044 | ehaG 1               | 65,3            | 71,515    | 6,216          | forward | Trimeric Autotransporter: YadA like               | Vpar_0051             | VtaD | Vc    |
| FNLLGLLA_00045 | upaG 2               | 71,995          | 81,42     | 9,426          | forward | Trimeric Autotransporter: YadA like               | Vpar_0052             | VtaE | Vc    |
| FNLLGLLA_00046 | ata 2                | 81,941          | 91,519    | 9,579          | forward | Trimeric Autotransporter: YadA like               | Vpar_0053             | VtaF | Vc    |
| FNLLGLLA_00098 | btaE 3               | 151,792         | 153,522   | 1,731          | forward | Trimeric Autotransporter/ S-layer homology domain | Vpar_0100             | VtaG | Vc    |
| FNLLGLLA_00099 | ata 3                | 154,024         | 158,982   | 4,959          | forward | Trimeric Autotransporter/ S-layer homology domain | absent                | VtaH | Vc    |
| FNLLGLLA_00335 | prn 2                | 414,666         | 416,888   | 2,223          | forward | Autotransporter                                   | Vpar_0330             | VmaB | Va    |
| FNLLGLLA_00516 | btaF                 | 581,236         | 590,358   | 9,123          | forward | Trimeric Autotransporter: YadA like               | Vpar_0464             | VtaA | Vc    |
| FNLLGLLA_00581 | brkA                 | 668,34          | 670,583   | 2,244          | forward | Autotransporter                                   | Vpar_1322             | VmaC | Va    |
| FNLLGLLA_01790 | ehaG 2               | 1,943,661       | 1,946,159 | 2,499          | reverse | Trimeric Autotransporter/ S-layer homology domain | Vpar_1664             | VtaI | Vc    |

744

Table 1 : *V. parvula* SKV38 autotransporters

| Strain name                     | Description                                                                                                                 | Reference  |
|---------------------------------|-----------------------------------------------------------------------------------------------------------------------------|------------|
| WT                              | <i>Veillonella parvula</i> SKV38                                                                                            | (17)       |
| 9G5                             | <i>Veillonella parvula</i> SKV38 <i>FNLLGLLA_00516::Transposon</i>                                                          | This study |
| 5C5                             | <i>Veillonella parvula</i> SKV38 <i>FNLLGLLA_00516::Transposon</i>                                                          | This study |
| 5H1                             | <i>Veillonella parvula</i> SKV38 <i>FNLLGLLA_00516::Transposon</i>                                                          | This study |
| 3D6                             | <i>Veillonella parvula</i> SKV38 <i>FNLLGLLA_00516::Transposon</i>                                                          | This study |
| 7B11                            | <i>Veillonella parvula</i> SKV38 <i>FNLLGLLA_00516::Transposon</i>                                                          | This study |
| 2F7                             | <i>Veillonella parvula</i> SKV38 <i>FNLLGLLA_00516::Transposon</i>                                                          | This study |
| 3F7                             | <i>Veillonella parvula</i> SKV38 <i>FNLLGLLA_00516::Transposon</i>                                                          | This study |
| 5E11                            | <i>Veillonella parvula</i> SKV38 <i>FNLLGLLA_01127::Transposon</i>                                                          | This study |
| $\Delta$ vtaA                   | <i>Veillonella parvula</i> SKV38 $\Delta$ <i>FNLLGLLA_00516::tetM</i>                                                       | This study |
| pTet-vtaA                       | <i>Veillonella parvula</i> SKV38 <i>catP-Term(fdx)-Ptet-FNLLGLLA_00516</i>                                                  | This study |
| $\Delta$ 8                      | <i>Veillonella parvula</i> SKV38 $\Delta$ <i>FNLLGLLA_00036-46::tetM</i>                                                    | This study |
| $\Delta$ vmaA                   | <i>Veillonella parvula</i> SKV38 $\Delta$ <i>FNLLGLLA_00032::tetM</i>                                                       | This study |
| $\Delta$ vtaB                   | <i>Veillonella parvula</i> SKV38 $\Delta$ <i>FNLLGLLA_00034::tetM</i>                                                       | This study |
| $\Delta$ vtaG                   | <i>Veillonella parvula</i> SKV38 $\Delta$ <i>FNLLGLLA_00098::tetM</i>                                                       | This study |
| $\Delta$ vtaH                   | <i>Veillonella parvula</i> SKV38 $\Delta$ <i>FNLLGLLA_00099::tetM</i>                                                       | This study |
| $\Delta$ vmaB                   | <i>Veillonella parvula</i> SKV38 $\Delta$ <i>FNLLGLLA_00335::tetM</i>                                                       | This study |
| $\Delta$ vmaC                   | <i>Veillonella parvula</i> SKV38 $\Delta$ <i>FNLLGLLA_00581::tetM</i>                                                       | This study |
| $\Delta$ vtaI                   | <i>Veillonella parvula</i> SKV38 $\Delta$ <i>FNLLGLLA_01790::tetM</i>                                                       | This study |
| $\Delta$ vtaA $\Delta$ 8        | <i>Veillonella parvula</i> SKV38 $\Delta$ <i>FNLLGLLA_00516::catP<br/><math>\Delta</math><i>FNLLGLLA_00036-46::tetM</i></i> | This study |
| $\Delta$ 1127                   | <i>Veillonella parvula</i> SKV38 $\Delta$ <i>FNLLGLLA_01127::tetM</i>                                                       | This study |
| $\Delta$ 1127 $\Delta$ 8        | <i>Veillonella parvula</i> SKV38 $\Delta$ <i>FNLLGLLA_01127::tetM<br/><math>\Delta</math><i>FNLLGLLA_00036-46::catP</i></i> | This study |
| WT+pEmpty                       | <i>Veillonella parvula</i> SKV38-pBSJL2- <i>catP-pmdh</i>                                                                   | This study |
| $\Delta$ 1127+pEmpty            | <i>Veillonella parvula</i> SKV38 $\Delta$ <i>FNLLGLLA_01127::tetM-<br/>pBSJL2-<i>catP-pmdh</i></i>                          | This study |
| $\Delta$ 1127+p1127             | <i>Veillonella parvula</i> SKV38 $\Delta$ <i>FNLLGLLA_01127::tetM-<br/>pBSJL2-<i>catP-pmdh-FNLLGLLA_01127</i></i>           | This study |
| P <sub>tet</sub> - $\phi$       | SKV38- pRPF185 <i>gusA</i>                                                                                                  | This study |
| P <sub>tet</sub> - <i>gusA</i>  | SKV38- pRPF185                                                                                                              | This study |
| P <sub>Cwp2</sub> - <i>gusA</i> | SKV38- pRPF144                                                                                                              | This study |

| Plasmid | Description | Reference |
|---------|-------------|-----------|
|---------|-------------|-----------|

|                      |                                                                                                                                                             |            |
|----------------------|-------------------------------------------------------------------------------------------------------------------------------------------------------------|------------|
| pRPF215              | <i>mariner</i> Tn delivery plasmid, P <sub>tet</sub> :: <i>HimarI</i> , ITR- <i>ermB</i> -ITR, <i>catP</i> , <i>tetR</i>                                    | (20)       |
| pRPF185              | tetracycline inducible expression system fused with β-glucuronidase <i>gusA</i> Term(fdx)- P <sub>tet</sub> - <i>gusA</i> -Term( <i>slpA</i> ), <i>catP</i> | (65)       |
| pRPF185Δ <i>gusA</i> | pDIA6103, tetracycline inducible expression system Term(fdx)-P <sub>tet</sub> -Term( <i>slpA</i> ), <i>catP</i>                                             | (68)       |
| pRPF144              | carries a <i>Clostridium</i> constitutive promoter fused with <i>gusA</i> P <sub>Cwp2</sub> - <i>gusA</i>                                                   | (65)       |
| pBSJL2               | <i>E. coli</i> - <i>Veillonella</i> shuttle plasmid, P <sub>gyrA</sub> :: <i>tetM</i>                                                                       | (69)       |
| pBSJL2-cat           | <i>E. coli</i> - <i>Veillonella</i> shuttle plasmid, P <sub>cat</sub> :: <i>catP</i> , <i>pmdh</i> promoter                                                 | This study |
| p1127                | pBSJL2- <i>catP</i> - <i>pmdh</i> -FNLLGLLA_01127                                                                                                           | This study |

746 **Table 2: Strains and plasmids used in this study**

747

748

749

750 **FIGURES AND FIGURES LEGEND**

751



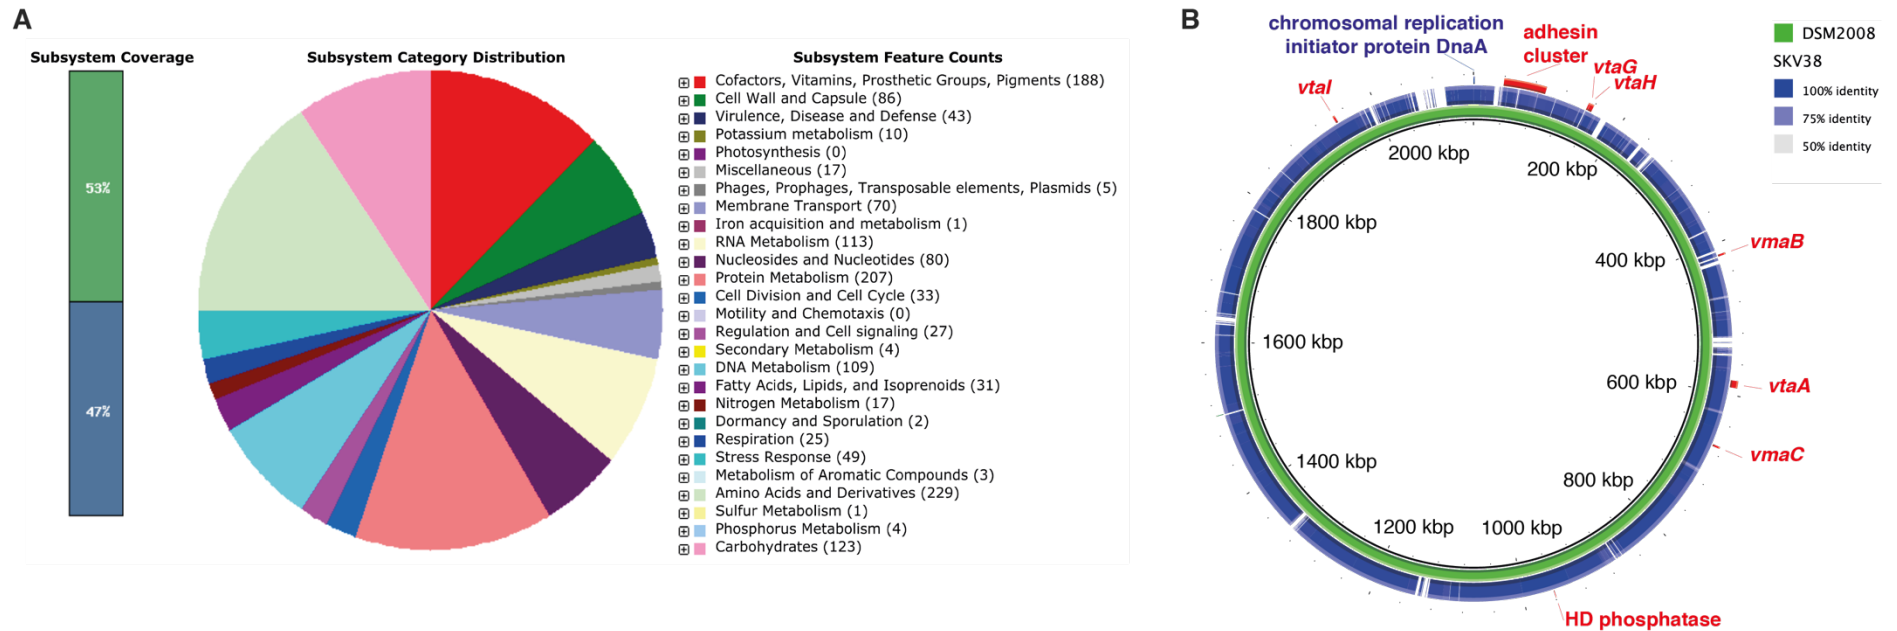

752  
 753 Figure 1: ***V. parvula SKV38 genome analysis.*** A. RAST functional annotation of the *V. parvula* SKV38 genome. Left panel: Subsystem coverage.  
 754 Green color indicates the percentage of predicted proteins assigned to known subsystems, blue those that were not. Center and right panels:  
 755 Subsystem category distribution: the number of proteins assigned to each category is depicted on the right panel. The analysis was performed on  
 756 <https://rast.theseed.org> server (70–72) B. Comparison of the genetic identity between *V. parvula* SKV38 and the reference strain, DSM2008. The  
 757 position of genes coding for potential biofilm determinants discussed in this study are indicated in the *V. parvula* genome.

758

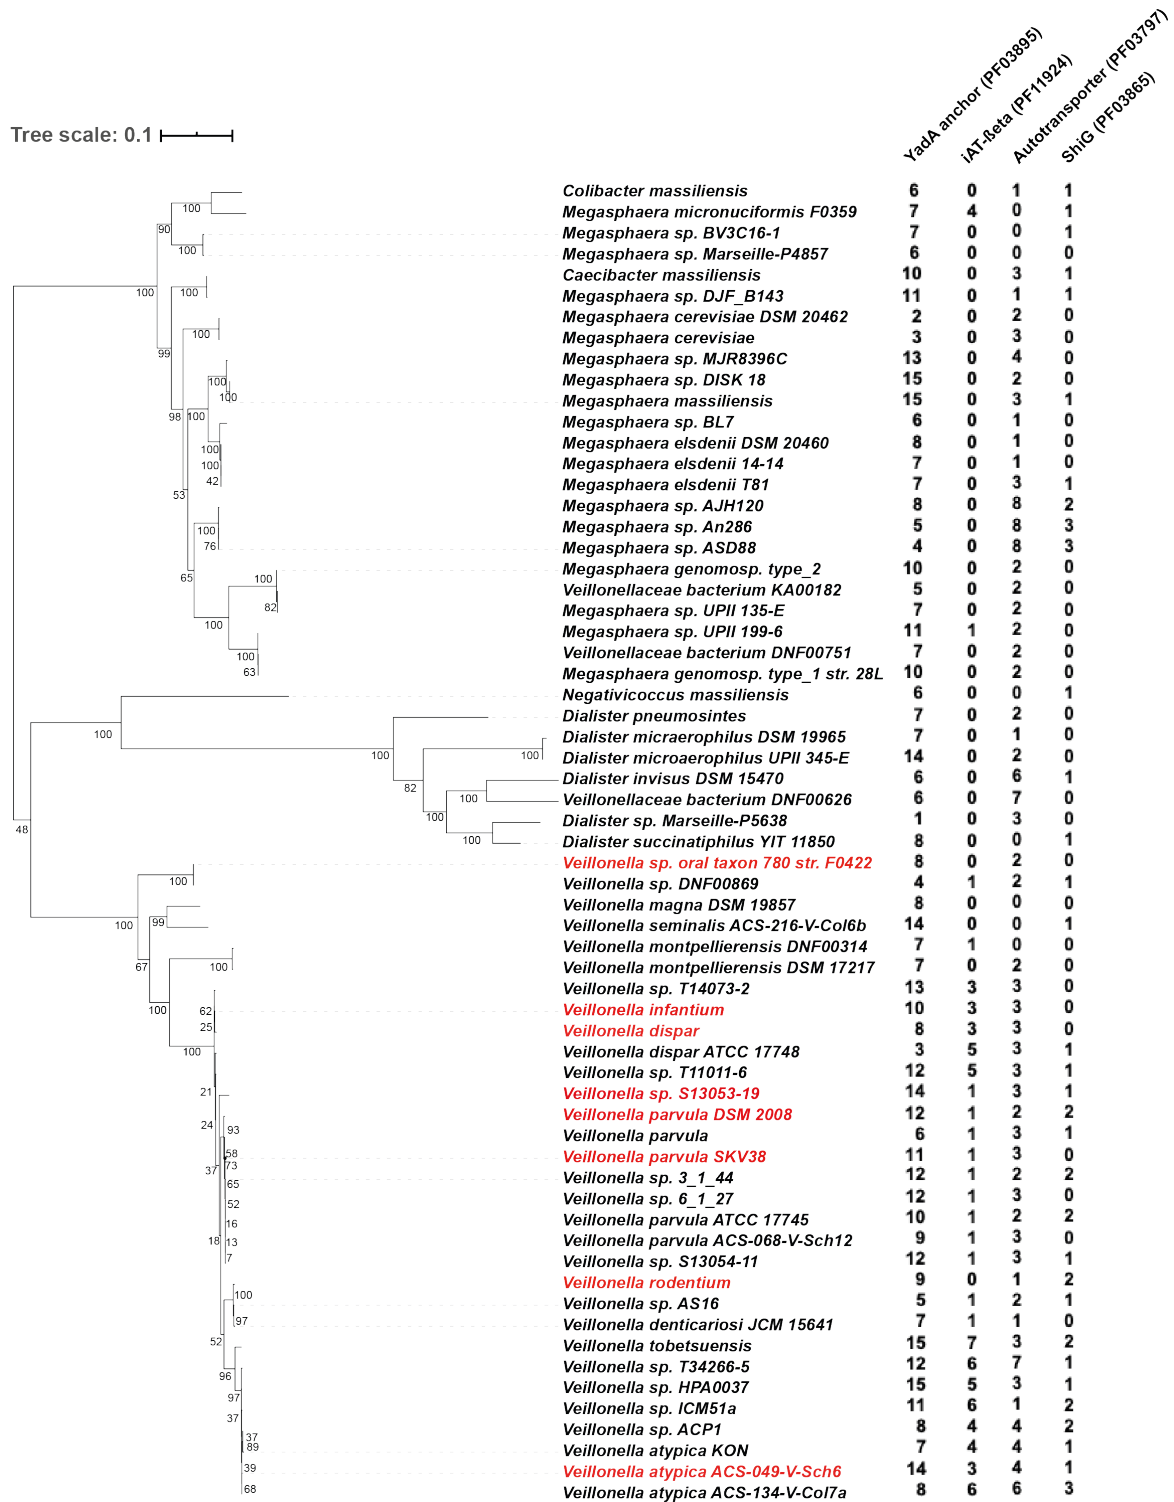

759  
760  
761  
762  
763  
764  
765  
766  
767  
768

**Figure 2: Phylogenetic tree of Veillonellaceae and prevalence of the main type V secreted adhesins.** Maximum likelihood phylogenetic tree constructed from a concatenated dataset of RpoB, RpoC, InfB, comprising 3027 amino acid positions, and rooted by other Negativicutes (see material and methods). Numbers at nodes represent bootstrap values calculated based on 100 replicates of the initial character supermatrix. The number of the four main classes of potential type V secreted adhesins queried by an HMM search is indicated for every species. The scale bar indicates the average number of substitutions per site. Species whose adhesin gene clusters were analyzed on Figure 7 are colored in red.

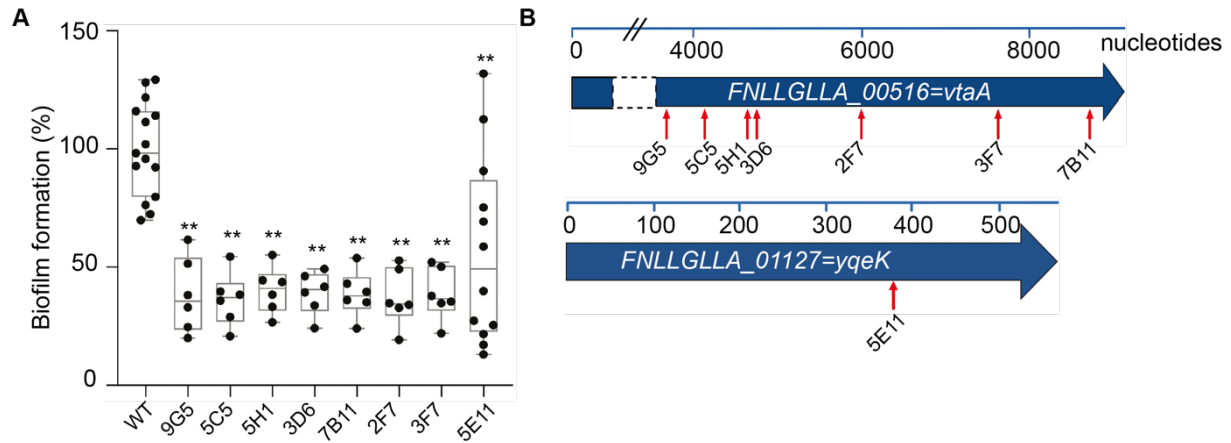

769

770 **Figure 3: Random transposon mutagenesis in *Veillonella parvula* SKV38 led to**  
771 **identification of mutants with reduced biofilm formation.** **A.** 96-well polystyrene plate  
772 biofilm assay after CV staining of nine transposon mutants identified by random mutagenesis  
773 grown 24h in BHILC. Mean of WT is adjusted to 100 %. Min-max boxplot of 6-15 biological  
774 replicates for each strain are represented, each replicate is the mean of two technical replicates.  
775 \* p-value<0.05, \*\* p-value <0.005, Mann-Whitney test. **B.** Schematic representation of the  
776 transposon insertion point identified (red arrow) for the 8 transposon mutants. Blue bar  
777 represents the size of the gene in nucleotides.

778

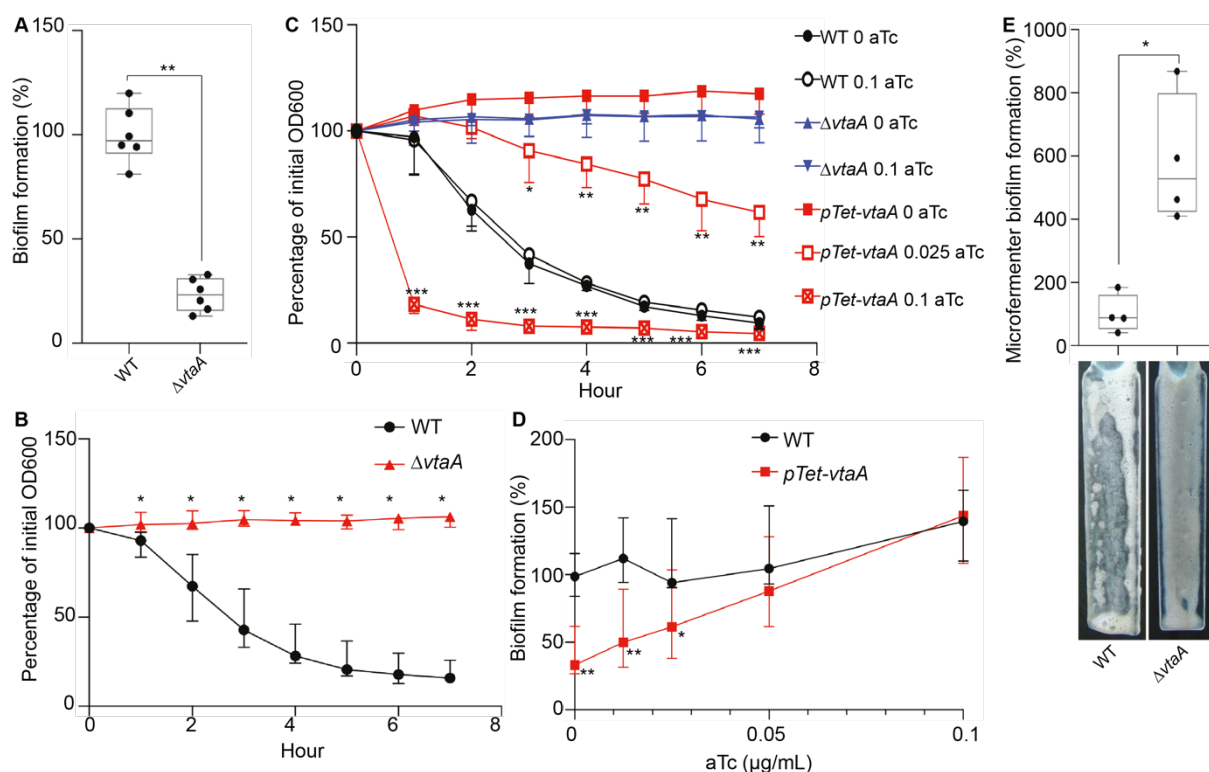

779

780 **Figure 4: VtaA is an adhesin involved in auto-aggregation and biofilm formation.** **A.** 96-  
 781 well plate biofilm assay after 24h growth in BHILC. Mean of WT is adjusted to 100 %. Min-  
 782 max boxplot of 6 biological replicates for each strain. \* p-value<0.05, \*\* p-value <0.005,  
 783 Mann-Whitney test between strains. **B.** and **C.** Aggregation curve in spectrophotometry cuvette  
 784 of WT and  $\Delta vtaA$  (**B**) and of an inducible *vtaA* with 0, 0.025 or 0.1  $\mu\text{g/mL}$  of the inducer aTc  
 785 (**C**). 100 % represent lack of aggregation, 0 % complete sedimentation of the culture. Median  
 786 of 6 biological replicates, error bars represent 95% confidence interval. At each time points we  
 787 computed the Mann-Whitney test between conditions. We applied Bonferroni correction for  
 788 multiple testing: p-value are only considered significant if \*p-value<0.004, \*\*p-value<0.0004,  
 789 \*\*\*p-value<0.00004. Indicated p-values were calculated by comparing in **B**, WT and  $\Delta vtaA$ ,  
 790 and in **C**, *pTet-vtaA* without aTc and *pTet-vtaA* with different aTc concentrations. **D.** 96-well  
 791 plate biofilm assay after 24h growth of an inducible *vtaA* in BHILC with different  
 792 concentrations of aTc. WT without aTc is adjusted to 100 %. Median of 6 biological replicates,  
 793 each replicate corresponds to the mean of two technical replicates, error bars represent 95%  
 794 confidence interval. \* p-value<0.05, \*\* p-value <0.005, Mann-Whitney test. **E.** Biofilm  
 795 formation in continuous flow microfermentor on glass spatula during 48h in BHILC. WT was  
 796 adjusted to 100 %. Min-max boxplot of 4 biological replicates for each strain. A picture of the  
 797 spatula before resuspension is shown below each histogram bar. \* p-value<0.05, Mann-  
 798 Whitney test.

799

800

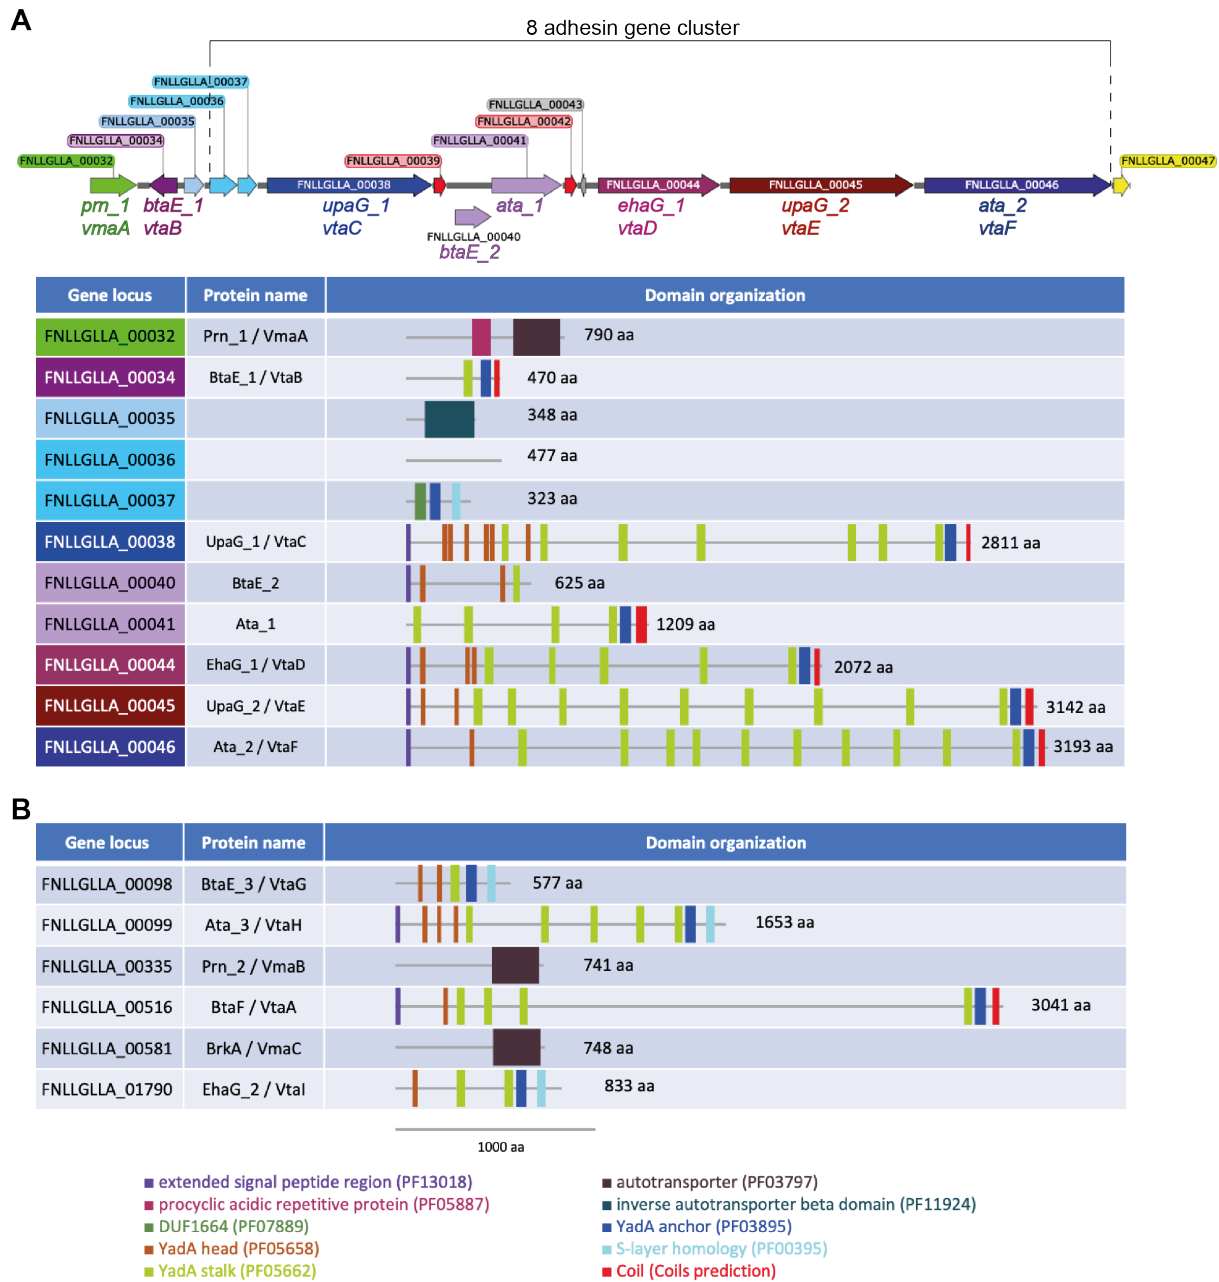

801

802 Figure 5: *Veillonella parvula* autotransporters domain organization. **A.** Genetic  
 803 organization of the *V. parvula* SKV38 autotransporter adhesin gene cluster and the  
 804 corresponding adhesin domain organization. **B.** Domain organization of the six remaining *V.*  
 805 *parvula* SKV38 autotransporter adhesins encoded by genes located outside of the cluster.  
 806 Domains were detected with the HMMER package (59), only the domains with e-values lower  
 807 than  $10^{-3}$  are shown. Presence of C-terminal coils structure was determined using the COILS  
 808 program ([https://embnet.vital-it.ch/software/COILS\\_form.html](https://embnet.vital-it.ch/software/COILS_form.html)).

809

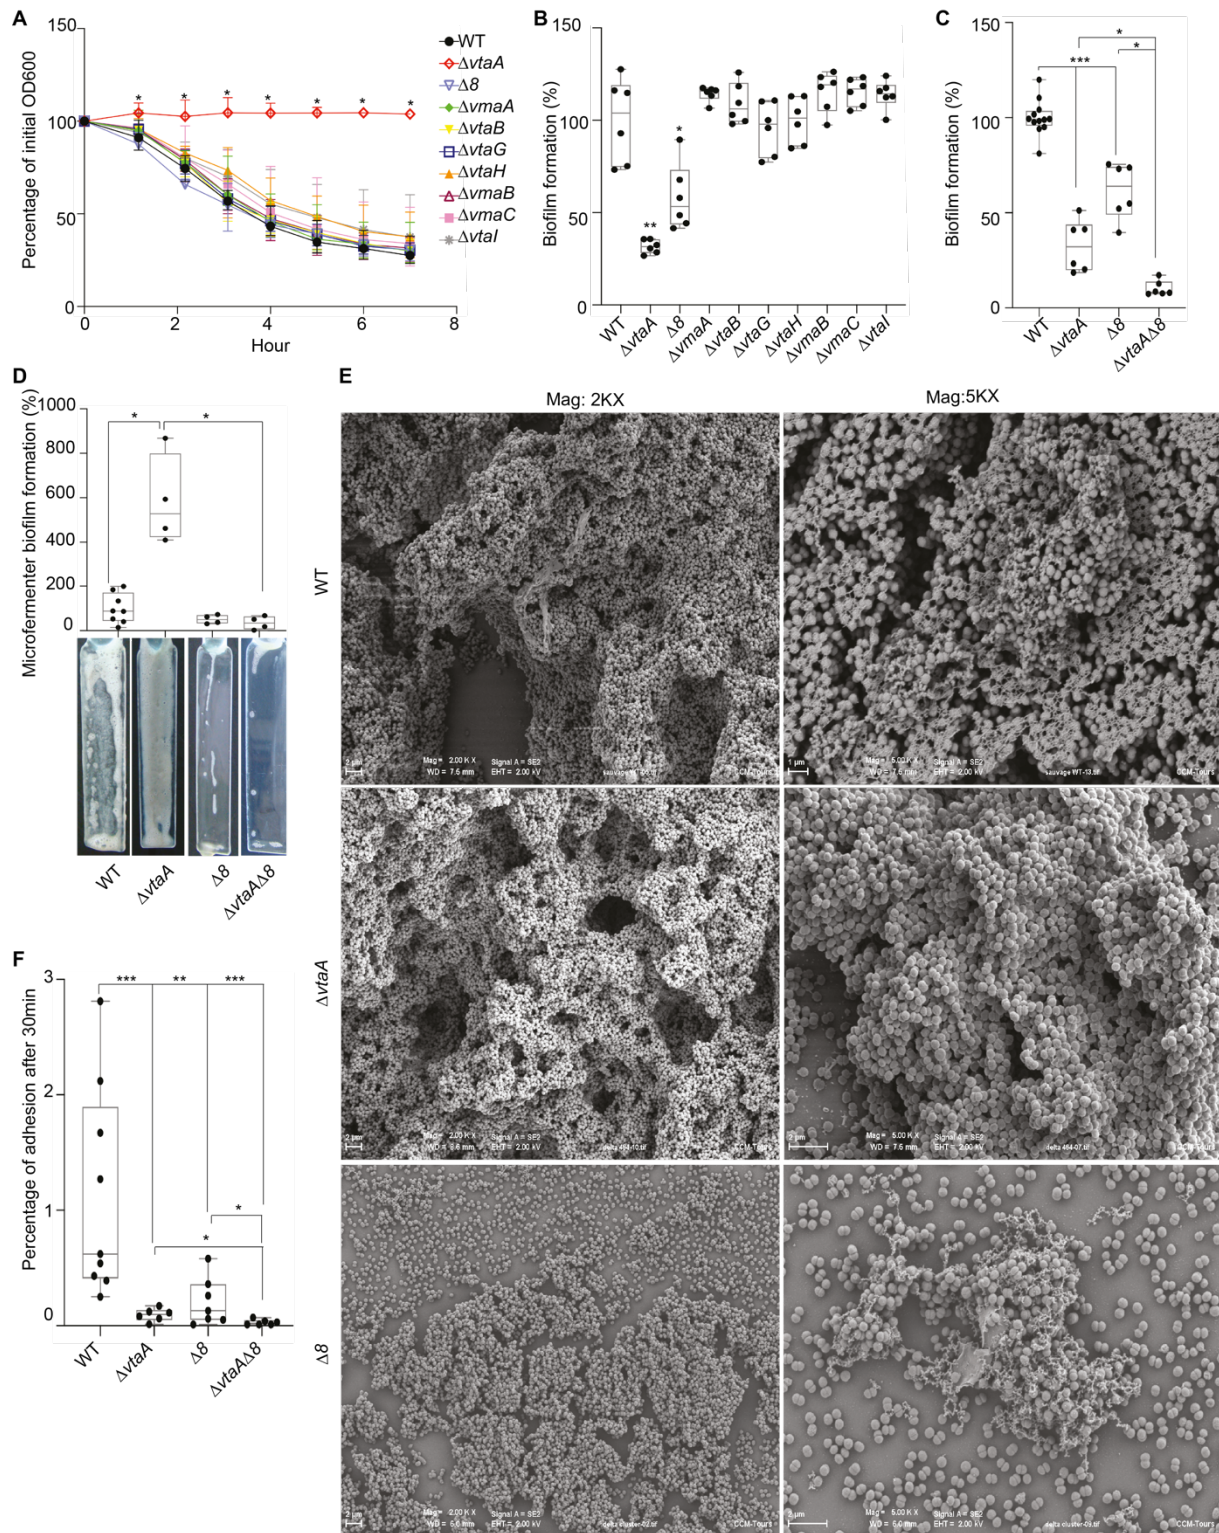

810

811 **Figure 6: A cluster of eight trimeric autotransporters is involved in surface binding.**  
 812 **A.** Aggregation curve in spectrophotometry cuvette. 100 % represent lack of aggregation, 0 %  
 813 complete sedimentation of the culture. Median of 6 biological replicates, error bars represent  
 814 95% confidence interval. \* Mann-Whitney test, corrected for multiple testing with Bonferroni  
 815 correction: significance is achieved if p-value < 0.007. **B.** and **C.** 96-well plate biofilm assay  
 816 after 24 h growth in BHILC. Mean of WT is adjusted to 100 %. Min-max boxplot of 6 biological  
 817 replicates for each strain, each replicate is the mean of two technical replicates. In **B.** we applied  
 818 a Mann-Whitney; \* p-value<0.05, \*\* p-value <0.005. In **C.** we applied Bonferroni correction

819 for multiple testing: tests were called significant only if  $p$ -value $<0.01$ : \*  $p$ -value $<0.01$ , \*\*  $p$ -  
820 value  $<0.001$ , \*\*\*  $p$ -value  $<0.0001$ . **D.** Biofilm formation in continuous flow microfermentor  
821 on glass spatula during 48h in BHILC. WT was adjusted to 100 %. Min-max boxplot of 4  
822 biological replicates for each strain. \*  $p$ -value $<0.05$ , Mann-Whitney test. A picture of spatula  
823 before resuspension is shown for each mutant on the right. **E.** Scanning electronic microscopy  
824 (SEM) of biofilms grown under continuous flow of BHILC in microfermentor on plastic  
825 microscopy slide, magnified 2K or 5K times. **F.** Initial adhesion on glass spatula. Percentage  
826 of CFU that adhered to the spatula controlled by the number of CFU of the inoculation solution.  
827 Min-max boxplot of 6-9 replicates per strain is represented. \*  $p$ -value $<0.05$ , \*\*  $p$ -value  $<0.005$ ,  
828 \*\*\*  $p$ -value  $<0.0005$ , Mann-Whitney test.

829

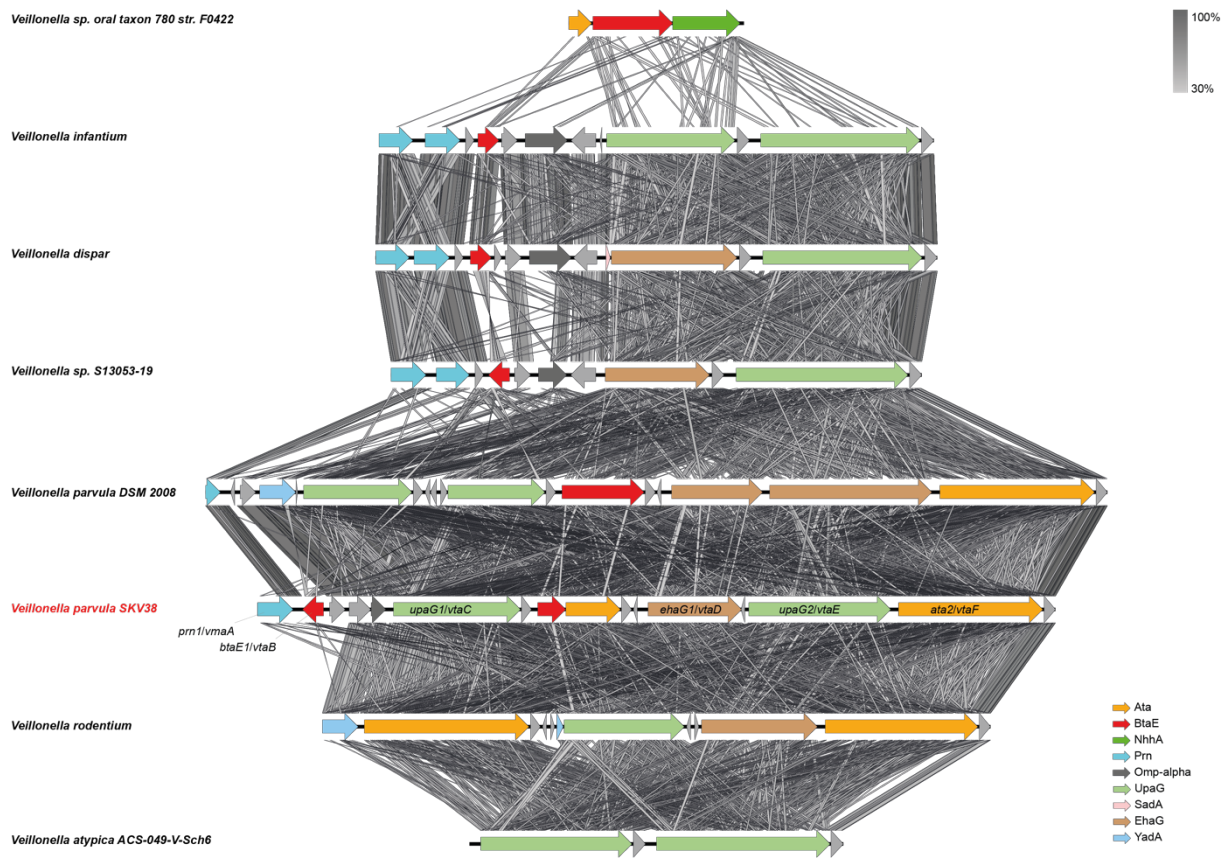

830

831 **Figure 7: Synteny of the adhesin gene cluster in a selection of *Veillonella* species.** The  
832 synteny of the proteins of the cluster between the closest relatives was assessed using EasyFig  
833 (64). Oblique lines between genes represent tblastx identities (program parameters: maximum  
834 e-value of  $10^{12}$ , minimum length of 30, minimum identity of 30). The *V. parvula* SKV38 strain  
835 used in this study is presented in red. The functional genes of the cluster are indicated.  
836



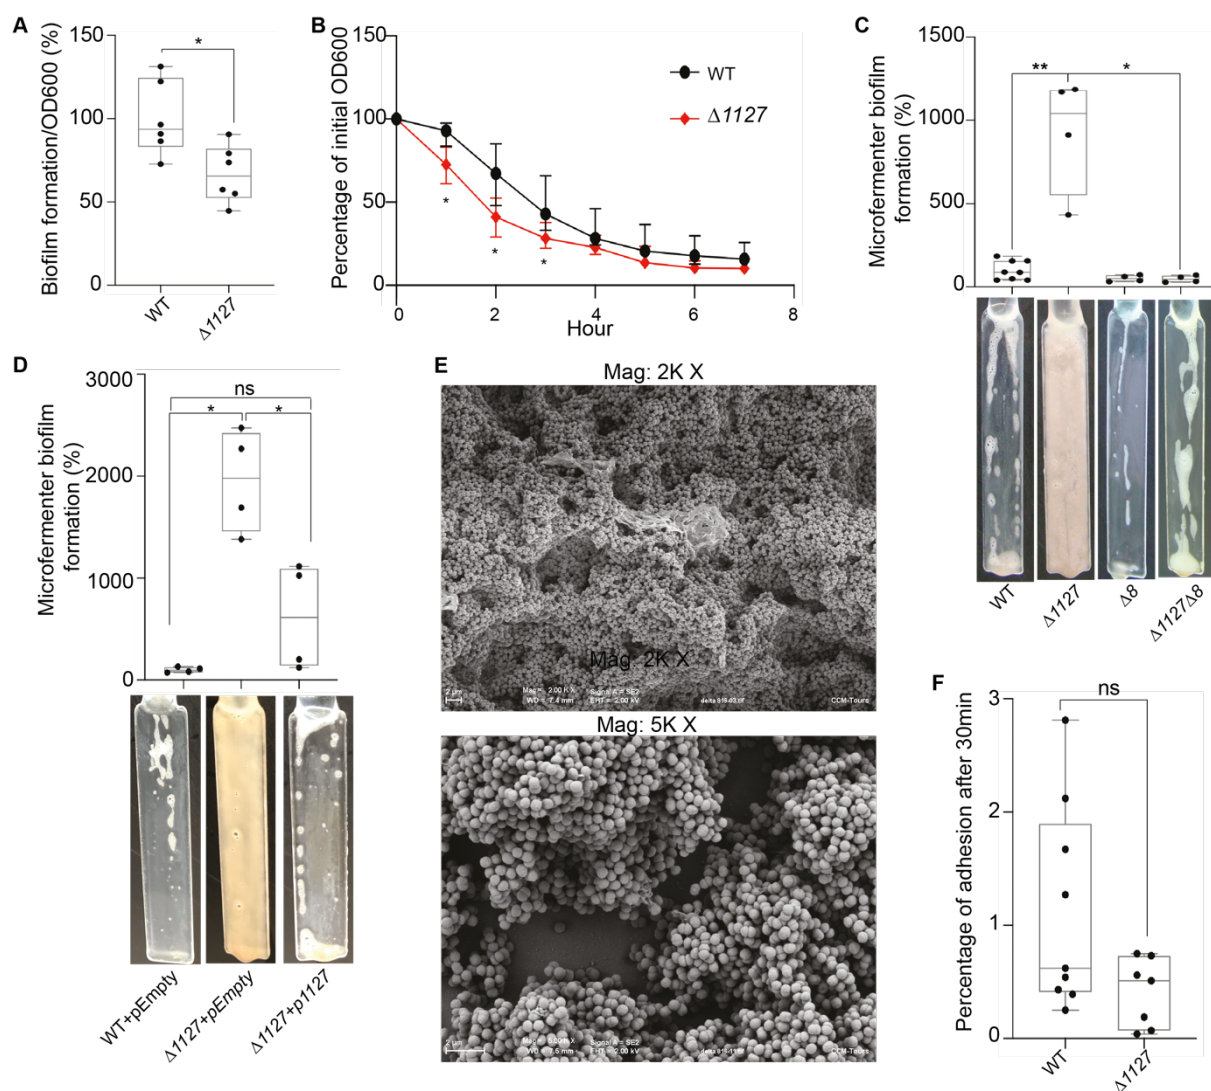

837

838 **Figure 8: *FNLGLLA\_01127* represses biofilm formation in microfermentor.** **A.** 96-well  
 839 plate biofilm assay after 24 h growth in BHILC corrected by OD<sub>600</sub> after 24 h growth in plate.  
 840 Mean of WT is adjusted to 100 %. Min-max boxplot of 6 biological replicates for each strain,  
 841 each replicate is the mean of two technical replicates. \* p-value < 0.05, Mann-Whitney test. **B.**  
 842 Aggregation curve in spectrophotometry cuvette. 100 % represent lack of aggregation, 0 %  
 843 complete sedimentation of the culture. Median of 6 biological replicates, error bars represent  
 844 95% confidence interval. \* Mann-Whitney test, corrected for multiple testing with Bonferroni  
 845 correction: significance is achieved if p-value<0.007. **C.** Biofilm formation in continuous flow  
 846 microfermentor on glass spatula during 48h in BHILC. Mean of WT is adjusted to 100 %. Min-  
 847 max boxplot of 4 biological replicates for each strain. \* p-value < 0.05, \*\* p-value<0.005,  
 848 Mann-Whitney test. A picture of a spatula before resuspension is shown for each strain below  
 849 the histogram. **D.** Biofilm formation in continuous flow microfermentor on glass spatula during  
 850 48h in BHILC+chloramphenicol. Mean of WT+pEmpty is adjusted to 100 %. Min-max boxplot  
 851 of 4 biological replicates for each strain. \* p-value < 0.05, Mann-Whitney test. A picture of a  
 852 spatula before resuspension is shown for each strain below the histogram. **E.** Scanning  
 853 electronic microscopy of  $\Delta 1127$  biofilm grown under continuous flow of BHILC in  
 854 microfermentor on a plastic microscopy slide. Magnification 2K and 5K. **F.** Initial adhesion on  
 855 glass spatula. Percentage of CFU that adhered to the spatula in 30 min controlled by the number  
 856 of CFU of the inoculation solution. Min-max boxplot of 6-9 replicates per strain. \* p-  
 857 value<0.05, Mann-Whitney test.
